# Supplementary material for: Transcriptome Remodeling of Acinetobacter baumannii during Infection and Treatment
Source: PubMed Central journal article supplement (PMC5340874; doi:10.1128/mbio.02193-16), 2017-03-07
Supplement: mbo001173221st1.pdf [file mbo001173221st1.pdf]

| Locus Tag   | Predicted Protein                                       | DE in # of other patients | ABUH66241 | ABUH66253 | ABUH66268 | ABUH66271 | ABUH66276 |
|-------------|---------------------------------------------------------|---------------------------|-----------|-----------|-----------|-----------|-----------|
|             |                                                         |                           |           |           |           |           |           |
| ACICU_00053 | hypothetical protein                                    |                           | 124.90    | 16.38     | 15.22     | 13.55     | 18.22     |
| ACICU_00061 | oxidoreductase                                          | 3                         | 21.61     | 12.79     | 86.45     | 29.95     | 100.18    |
| ACICU_00062 | fatty acid desaturase                                   | 3                         | 53.90     | 35.11     | 172.87    | 67.52     | 260.33    |
| ACICU_00087 | UDP-galactose phosphate transferase                     |                           | 599.95    | 518.15    | 592.10    | 603.25    | 45.66     |
| ACICU_00088 | nucleotidyl transferase                                 |                           | 1007.92   | 763.28    | 953.22    | 1089.81   | 85.77     |
| ACICU_00089 | UDP-glucose 6-dehydrogenase                             |                           | 710.28    | 563.32    | 639.66    | 542.98    | 142.52    |
| ACICU_00090 | glucose-6-phosphate isomerase                           |                           | 545.36    | 488.88    | 384.56    | 449.36    | 170.03    |
| ACICU_00091 | UDP-galactose-4-epimerase                               |                           | 1694.82   | 1045.56   | 1362.47   | 1139.07   | 422.51    |
| ACICU_00095 | lactate dehydrogenase                                   | 3                         | 779.97    | 333.90    | 1487.88   | 902.11    | 652.10    |
| ACICU_00475 | preprotein translocase                                  |                           | 71.17     | 60.99     | 18.65     | 20.13     | 101.74    |
| ACICU_00571 | NAD(P) transhydrogenase subunit alpha                   | 2                         | 257.45    | 160.07    | 529.89    | 758.03    | 105.22    |
| ACICU_00572 | NAD(P) transhydrogenase subunit alpha                   |                           | 41.50     | 22.06     | 70.45     | 92.06     | 13.03     |
| ACICU_00573 | NAD synthetase                                          |                           | 208.08    | 130.11    | 359.33    | 465.80    | 70.23     |
| ACICU_00594 | acyl-CoA synthetase                                     | 2                         | 544.90    | 491.63    | 314.20    | 267.81    | 101.11    |
| ACICU_00662 | acyl-CoA dehydrogenase                                  |                           | 339.55    | 316.64    | 493.92    | 432.20    | 142.62    |
| ACICU_00678 | 5-methyltetrahydropteroyltriglutamate-- homocysteine me |                           | 648.84    | 256.18    | 982.30    | 748.90    | 1189.23   |
| ACICU_00684 | membrane protein                                        | 4                         | 1023.92   | 638.35    | 783.57    | 484.22    | 84.41     |
| ACICU_00761 | trehalose-6-phosphate synthase                          | 3                         | 8057.01   | 3824.25   | 3247.87   | 3099.47   | 676.16    |
| ACICU_00762 | trehalose phosphatase                                   | 6                         | 489.52    | 230.81    | 80.94     | 114.00    | 22.88     |
| ACICU_00861 | gamma-glutamyltransferase                               | 2                         | 506.26    | 551.04    | 705.04    | 383.21    | 711.93    |
| ACICU_00888 | choline dehydrogenase                                   | 3                         | 786.24    | 795.77    | 2251.59   | 1160.01   | 4508.25   |
| ACICU_00889 | betaine-aldehyde dehydrogenase                          | 2                         | 1115.53   | 1297.04   | 2559.25   | 1651.95   | 3827.99   |
| ACICU_00890 | Bet1 family transcriptional regulator                   | 2                         | 971.97    | 1189.61   | 1987.74   | 1351.72   | 3107.91   |
| ACICU_00891 | choline transporter                                     | 2                         | 369.61    | 495.09    | 691.38    | 396.99    | 1231.43   |
| ACICU_00900 | polysaccharide deacetylase                              | 3                         | 634.58    | 1788.40   | 674.95    | 639.62    | 468.12    |
| ACICU_00901 | N-glycosyltransferase                                   | 3                         | 526.63    | 1158.79   | 482.76    | 472.90    | 364.49    |
| ACICU_00958 | esterase                                                |                           | 56.55     | 72.43     | 19.36     | 55.29     | 9.05      |
| ACICU_01027 | hypothetical protein                                    | 4                         | 336.20    | 132.09    | 58.14     | 132.47    | 45.12     |
| ACICU_01085 | amino acid transporter                                  | 3                         | 95.19     | 58.00     | 35.97     | 35.40     | 123.42    |
| ACICU_01192 | benzene 1,2-dioxygenase                                 |                           | 121.77    | 153.80    | 114.13    | 98.84     | 36.14     |
| ACICU_01198 | cysteine-rich helical bundle repeat protei              | 4                         | 14151.94  | 5554.72   | 6599.69   | 7556.01   | 1658.15   |
| ACICU_01214 | hypothetical protein                                    | 3                         | 503.07    | 418.19    | 242.08    | 391.85    | 106.46    |
| ACICU_01215 | hypothetical protein                                    | 3                         | 343.87    | 187.23    | 86.52     | 244.30    | 40.72     |
| ACICU_01216 | head morphogenesis protein                              | 3                         | 503.35    | 250.18    | 207.56    | 282.44    | 73.44     |
| ACICU_01221 | hypothetical protein                                    | 3                         | 906.88    | 405.53    | 572.92    | 574.08    | 76.19     |
| ACICU_01261 | type VI secretion system protein                        | 3                         | 826.82    | 812.51    | 922.42    | 942.66    | 595.77    |
| ACICU_01266 | membrane protein                                        | 2                         | 1974.99   | 1995.32   | 896.64    | 1046.47   | 579.23    |
| ACICU_01268 | hypothetical protein                                    | 2                         | 1774.31   | 1614.63   | 934.21    | 815.23    | 378.86    |
| ACICU_01270 | allophanate hydrolase                                   | 2                         | 920.09    | 1066.53   | 542.80    | 544.84    | 336.05    |
| ACICU_01272 | voltage-gated chloride channel protein                  |                           | 75.94     | 66.70     | 36.68     | 54.94     | 169.29    |
| ACICU_01407 | 2-isopropylmalate synthase                              |                           | 1481.78   | 1518.12   | 2278.80   | 1511.49   | 537.73    |
| ACICU_01408 | 3-methylcrotonyl-CoA carboxylase                        |                           | 1810.34   | 1804.31   | 2703.85   | 1956.69   | 698.33    |
| ACICU_01409 | enoyl-CoA hydratase                                     |                           | 908.78    | 959.87    | 1264.44   | 943.08    | 324.54    |
| ACICU_01411 | isovaleryl-CoA dehydrogenase                            |                           | 1413.37   | 1403.12   | 1958.59   | 1694.16   | 636.76    |
| ACICU_01420 | hypothetical protein                                    | 2                         | 134.24    | 126.69    | 40.87     | 82.00     | 32.50     |
| ACICU_01421 | hypothetical protein                                    | 2                         | 115.66    | 72.23     | 69.14     | 84.70     | 10.20     |
| ACICU_01422 | hypothetical protein                                    | 2                         | 7661.59   | 3716.13   | 4732.37   | 5261.69   | 674.46    |
| ACICU_01423 | hypothetical protein                                    | 4                         | 4854.43   | 2524.06   | 2805.23   | 3805.46   | 456.85    |
| ACICU_01425 | hypothetical protein                                    | 3                         | 6290.15   | 2514.64   | 3039.90   | 4062.26   | 1104.87   |
| ACICU_01426 | hydroperoxidase                                         | 3                         | 30036.13  | 15784.62  | 18685.37  | 20461.61  | 7275.68   |
| ACICU_01427 | short-chain dehydrogenase                               | 3                         | 746.24    | 330.76    | 332.58    | 434.04    | 125.23    |
| ACICU_01505 | Na+:H+ dicarboxylate symporter                          |                           | 786.35    | 651.74    | 485.03    | 316.56    | 48.59     |
| ACICU_01517 | hypothetical protein                                    |                           | 33.65     | 94.36     | 20.80     | 37.90     | 36.03     |
| ACICU_01518 | hypothetical protein                                    | 5                         | 140.09    | 4404.26   | 109.26    | 114.05    | 61.53     |
| ACICU_01552 | hypothetical protein                                    | 5                         | 17.46     | 1679.61   | 4.15      | 10.80     | 12.80     |
| ACICU_01553 | hypothetical protein                                    | 4                         | 7.66      | 115.84    | 9.69      | 13.01     | 13.01     |
| ACICU_01706 | porin                                                   |                           | 56.35     | 121.45    | 40.10     | 27.94     | 113.46    |
| ACICU_01762 | aspartate ammonia-lyase                                 |                           | 6246.04   | 4212.85   | 4204.26   | 3459.83   | 21.73     |

|             |                                             |   |         |          |          |          |          |
|-------------|---------------------------------------------|---|---------|----------|----------|----------|----------|
| ACICU_01767 | acetyl-CoA acetyltransferase                |   | 1467.29 | 1152.77  | 2160.98  | 1482.19  | 520.64   |
| ACICU_01769 | succinyl-CoA:3-ketoacid-CoA transferase     |   | 2117.85 | 2077.46  | 3575.96  | 1840.08  | 865.81   |
| ACICU_01770 | succinyl-CoA:3-ketoacid-CoA transferase     |   | 487.83  | 503.36   | 578.65   | 377.27   | 162.66   |
| ACICU_01801 | hypothetical protein                        | 3 | 97.63   | 49.98    | 35.96    | 54.26    | 13.26    |
| ACICU_01805 | hypothetical protein                        | 4 | 78.44   | 36.49    | 25.58    | 24.06    | 9.52     |
| ACICU_01813 | pilus assembly protein fimA                 | 2 | 384.03  | 467.03   | 540.36   | 392.38   | 1653.31  |
| ACICU_01822 | peptidase S15                               |   | 19.43   | 111.50   | 20.75    | 24.50    | 49.05    |
| ACICU_01823 | adeC putative outer membrane efflux prc2    |   | 112.26  | 2375.57  | 255.23   | 192.90   | 829.20   |
| ACICU_01824 | adeB cation/multidrug efflux pump           | 2 | 624.35  | 10328.23 | 903.91   | 842.12   | 2594.07  |
| ACICU_01825 | adeA membrane fusion protein                | 3 | 305.23  | 4901.96  | 382.56   | 340.48   | 943.85   |
| ACICU_01911 | hemagglutinin                               | 3 | 249.72  | 353.21   | 442.61   | 356.29   | 1478.31  |
| ACICU_01912 | hemolysin activator protein                 | 4 | 61.75   | 173.90   | 193.00   | 155.93   | 646.01   |
| ACICU_01935 | alpha/beta hydrolase                        | 2 | 3150.59 | 3036.16  | 4082.84  | 4121.37  | 1179.62  |
| ACICU_01975 | acyl-CoA dehydrogenase                      | 2 | 55.10   | 38.19    | 20.07    | 14.04    | 4.18     |
| ACICU_01976 | glutamyl-tRNA amidotransferase              | 3 | 263.63  | 145.18   | 94.71    | 64.82    | 34.69    |
| ACICU_02071 | hypothetical protein                        | 4 | 135.09  | 67.73    | 56.68    | 80.82    | 22.30    |
| ACICU_02270 | hypothetical protein                        | 3 | 81.73   | 86.88    | 43.56    | 59.75    | 17.08    |
| ACICU_02276 | hypothetical protein                        | 4 | 164.43  | 87.72    | 76.84    | 122.94   | 19.72    |
| ACICU_02289 | hypothetical protein                        | 2 | 317.38  | 232.41   | 69.83    | 82.78    | 94.96    |
| ACICU_02347 | AMP-binding protein                         |   | 657.90  | 735.07   | 912.35   | 878.10   | 94.28    |
| ACICU_02348 | acyl-CoA dehydrogenase                      |   | 282.75  | 278.06   | 436.20   | 341.72   | 44.73    |
| ACICU_02349 | 3-hydroxy-2-methylbutyryl-CoA dehydrogenase |   | 555.95  | 499.35   | 690.87   | 732.38   | 75.72    |
| ACICU_02358 | glycine zipper                              |   | 343.66  | 94.88    | 86.43    | 77.18    | 71.09    |
| ACICU_02385 | hypothetical protein                        |   | 139.98  | 93.71    | 71.92    | 133.54   | 29.80    |
| ACICU_02431 | DNA-binding protein                         | 3 | 843.95  | 493.04   | 616.84   | 529.92   | 125.89   |
| ACICU_02432 | glycosyl transferase                        | 3 | 523.60  | 211.22   | 285.57   | 390.64   | 82.63    |
| ACICU_02433 | methyltransferase                           | 3 | 318.81  | 118.39   | 128.63   | 189.90   | 43.17    |
| ACICU_02434 | LmbE protein                                | 3 | 542.27  | 190.24   | 301.41   | 338.83   | 55.58    |
| ACICU_02435 | acyl-CoA dehydrogenase                      | 3 | 302.22  | 114.36   | 175.59   | 181.20   | 31.60    |
| ACICU_02436 | hypothetical protein                        | 3 | 5120.29 | 5179.19  | 2331.85  | 4314.46  | 941.53   |
| ACICU_02437 | gamma-aminobutyrate transporter             |   | 61.59   | 49.87    | 51.23    | 43.65    | 155.17   |
| ACICU_02438 | methylmalonate-semialdehyde dehydrogenase   |   | 62.62   | 53.99    | 72.58    | 62.74    | 211.45   |
| ACICU_02439 | omega amino acid--pyruvate aminotransferase |   | 86.91   | 128.15   | 133.39   | 91.07    | 431.80   |
| ACICU_02488 | hypothetical protein                        | 2 | 259.14  | 627.17   | 141.11   | 131.88   | 127.17   |
| ACICU_02501 | ABC transporter substrate-binding protein   |   | 21.63   | 26.11    | 94.08    | 130.04   | 14.17    |
| ACICU_02654 | phosphonate ABC transporter substrate-I3    |   | 558.35  | 854.55   | 305.55   | 237.18   | 731.01   |
| ACICU_02695 | membrane protein                            | 2 | 128.39  | 92.00    | 61.59    | 93.98    | 34.89    |
| ACICU_02696 | membrane protein                            | 2 | 460.49  | 383.65   | 276.01   | 420.25   | 146.28   |
| ACICU_02780 | permease                                    | 3 | 51.74   | 31.34    | 32.51    | 61.18    | 61.97    |
| ACICU_02866 | glycosyl transferase family 2               | 3 | 4.15    | 110.31   | 12.47    | 5.55     | 3.85     |
| ACICU_02868 | dolichyl-phosphate-mannose-protein ma       | 3 | 24.46   | 132.89   | 13.14    | 14.63    | 32.38    |
| ACICU_02894 | hypothetical protein                        |   | 107.16  | 77.92    | 71.94    | 91.03    | 136.42   |
| ACICU_02895 | peptide synthetase                          | 4 | 54.64   | 703.21   | 69.81    | 71.05    | 60.15    |
| ACICU_02907 | diacylglycerol kinase                       | 3 | 29.02   | 143.62   | 11.76    | 19.05    | 15.75    |
| ACICU_02930 | carbamoyl phosphate synthase large subunit  |   | 5591.48 | 8015.59  | 9875.43  | 8705.71  | 17209.35 |
| ACICU_02938 | type I secretion protein                    |   | 9198.27 | 5851.56  | 25940.18 | 16941.02 | 7037.04  |
| ACICU_03000 | ammonium transporter                        | 3 | 68.15   | 34.85    | 545.15   | 493.88   | 54.23    |
| ACICU_03001 | hypothetical protein                        | 3 | 6.99    | 55.91    | 2.76     | 10.70    | 3.85     |
| ACICU_03002 | pmrB histidine kinase                       | 3 | 208.51  | 696.16   | 192.34   | 214.31   | 183.25   |
| ACICU_03003 | pmrA transcriptional regulator              | 3 | 34.95   | 166.57   | 29.07    | 41.00    | 29.91    |
| ACICU_03004 | pmrC lipid A phosphoethanolamine trans      | 3 | 22.29   | 490.15   | 6.24     | 18.36    | 25.50    |
| ACICU_03056 | entericidin                                 | 3 | 1050.24 | 1393.51  | 433.35   | 521.55   | 385.62   |
| ACICU_03111 | peroxidase                                  | 4 | 1909.00 | 1017.31  | 675.08   | 856.32   | 393.93   |
| ACICU_03132 | hypothetical protein                        | 2 | 119.22  | 24.68    | 30.42    | 21.55    | 24.02    |
| ACICU_03139 | hypothetical protein                        |   | 541.26  | 126.44   | 89.16    | 70.55    | 107.22   |
| ACICU_03209 | acetyl-CoA carboxylase                      |   | 42.62   | 43.84    | 71.18    | 23.51    | 14.15    |
| ACICU_03286 | transcriptional regulator                   |   | 27.27   | 68.18    | 58.07    | 263.08   | 101.04   |
| ACICU_03287 | GTP-binding protein                         | 2 | 186.66  | 293.86   | 380.03   | 1091.33  | 350.38   |
| ACICU_03323 | transporter                                 |   | 1.74    | 4.72     | 0.69     | 3.29     | 91.39    |
| ACICU_03326 | hypothetical protein                        |   | 478.71  | 267.58   | 214.37   | 314.79   | 111.65   |
| ACICU_03347 | hypothetical protein                        |   | 155.81  | 108.58   | 67.05    | 56.81    | 41.46    |

|             |                                      |   |         |         |         |         |          |
|-------------|--------------------------------------|---|---------|---------|---------|---------|----------|
| ACICU_03422 | sulfate permease                     | 4 | 411.39  | 442.06  | 273.81  | 209.18  | 122.51   |
| ACICU_03426 | acetyl-CoA hydrolase                 |   | 5779.60 | 7900.97 | 4181.39 | 4330.99 | 254.40   |
| ACICU_03447 | hypothetical protein                 | 4 | 648.13  | 304.84  | 329.77  | 379.36  | 172.39   |
| ACICU_03476 | succinate-semialdehyde dehydrogenase |   | 1020.81 | 1008.76 | 1301.15 | 1084.67 | 6365.68  |
| ACICU_03477 | 4-aminobutyrate aminotransferase     |   | 1093.62 | 1305.87 | 1535.81 | 1180.88 | 10938.15 |
| ACICU_03479 | gamma-aminobutyrate transporter      |   | 841.11  | 827.51  | 904.85  | 692.15  | 6962.24  |
| ACICU_03493 | membrane protein                     | 2 | 725.21  | 1857.97 | 3019.81 | 1958.43 | 3681.67  |
| ACICU_03496 | acetate permease                     |   | 1502.34 | 1759.94 | 1467.07 | 1090.45 | 80.30    |
| ACICU_03497 | membrane protein                     |   | 94.04   | 85.08   | 61.62   | 66.73   | 6.35     |
| ACICU_03610 | fumarylacetoacetase                  | 4 | 949.65  | 669.97  | 534.96  | 491.41  | 182.20   |
| ACICU_03625 | glucose dehydrogenase                |   | 452.25  | 189.50  | 230.30  | 328.09  | 96.03    |
| ACICU_03627 | membrane protein                     | 3 | 402.24  | 389.79  | 168.85  | 248.99  | 117.93   |

## Patient 81

| Locus Tag   | Predicted Protein                     | DE in # of     |           |           |           |
|-------------|---------------------------------------|----------------|-----------|-----------|-----------|
|             |                                       | other patients | ABUH81366 | ABUH81389 | ABUH81452 |
| ACICU_00740 | 5'-methylthioadenosine nucleosidase   |                | 43.33     | 121.03    | 183.56    |
| ACICU_00762 | trehalose phosphatase                 | 6              | 49.93     | 97.28     | 230.62    |
| ACICU_01027 | hypothetical protein                  | 4              | 198.61    | 367.74    | 915.78    |
| ACICU_01071 | TonB-dependent receptor               |                | 54.77     | 93.93     | 71.66     |
| ACICU_01075 | integrase                             |                | 199.35    | 1025.54   | 1089.93   |
| ACICU_01252 | 4-hydroxybenzoate transporter         |                | 13.29     | 124.42    | 168.57    |
| ACICU_01470 | transcriptional regulator             | 2              | 99.54     | 90.62     | 112.06    |
| ACICU_01518 | hypothetical protein                  | 5              | 105.19    | 728.04    | 718.61    |
| ACICU_01552 | hypothetical protein                  | 5              | 19.24     | 223.98    | 331.16    |
| ACICU_01667 | acyl-CoA dehydrogenase                |                | 101.79    | 309.02    | 409.14    |
| ACICU_01668 | acyl-CoA dehydrogenase                |                | 75.48     | 327.98    | 422.13    |
| ACICU_01805 | hypothetical protein                  | 4              | 51.85     | 85.81     | 109.49    |
| ACICU_01823 | adeC putative outer mem1              | 2              | 264.90    | 39.53     | 30.30     |
| ACICU_01824 | adeB cation/multidrug eff             | 2              | 1271.79   | 51.83     | 49.88     |
| ACICU_01825 | adeA membrane fusion pr               | 3              | 406.66    | 17.00     | 16.98     |
| ACICU_01936 | acetoacetate decarboxyla              | 2              | 128.18    | 602.82    | 649.47    |
| ACICU_01937 | aldehyde dehydrogenase                |                | 110.20    | 456.85    | 558.31    |
| ACICU_01953 | GntR family transcriptional regulator |                | 318.74    | 83.84     | 106.24    |
| ACICU_01954 | hypothetical protein                  |                | 587.13    | 70.43     | 64.36     |
| ACICU_01972 | Rieske (2Fe-2S) protein               | 2              | 15.21     | 67.93     | 85.15     |
| ACICU_01976 | glutamyl-tRNA amidotrans              | 3              | 86.11     | 205.46    | 205.87    |
| ACICU_02989 | adenine deaminase                     |                | 1272.40   | 5135.68   | 4638.12   |
| ACICU_03004 | pmrC lipid A phosphoetha              | 3              | 23.34     | 94.04     | 82.94     |
| ACICU_03315 | membrane protein                      |                | 63.82     | 324.38    | 235.42    |
| ACICU_03609 | aromatic amino acid trans             | 2              | 35.22     | 890.20    | 900.85    |
| ACICU_03610 | fumarylacetoacetase                   | 4              | 212.49    | 13145.48  | 10351.75  |
| ACICU_03612 | glyoxalase                            | 2              | 17.47     | 202.21    | 186.58    |
| ACICU_03614 | 4-hydroxyphenylpyruvate               | 3              | 127.93    | 5119.15   | 5471.34   |
| RP84_13035  | molecular chaperone DnaJ              |                | 4.01      | 71.31     | 44.28     |
| RP84_13045  | hypothetical protein                  |                | 10.72     | 75.32     | 65.53     |
| RP84_13050  | hypothetical protein                  |                | 79.70     | 504.13    | 589.86    |
| RP84_13640  | hypothetical protein                  |                | 7.68      | 56.47     | 55.88     |
| RP84_13645  | hypothetical protein                  |                | 9.45      | 49.01     | 66.35     |
| RP84_13650  | hypothetical protein                  |                | 15.18     | 135.12    | 123.69    |
| RP84_15225  | hypothetical protein                  |                | 23.32     | 254.75    | 229.71    |
| RP84_15230  | hypothetical protein                  |                | 12.62     | 168.93    | 92.87     |
| RP84_15235  | hypothetical protein                  |                | 18.61     | 112.48    | 121.06    |
| RP84_15240  | hypothetical protein                  |                | 19.96     | 108.11    | 104.93    |
| RP84_15245  | hypothetical protein                  |                | 7.47      | 55.61     | 46.43     |
| RQ03_19675  | hypothetical protein                  |                | 0.42      | 32.93     | 35.06     |
| RQ03_19700  | membrane protein                      |                | 81.98     | 409.02    | 335.45    |

| <b>Locus Tag</b> | <b>Predicted Protein</b>                        | <b>DE in # of other patients</b> | <b>ABUH28081</b> | <b>ABUH28092</b> | <b>ABUH28093</b> | <b>ABUH28099</b> |
|------------------|-------------------------------------------------|----------------------------------|------------------|------------------|------------------|------------------|
| ACICU_00024      | membrane protein                                |                                  | 183.29           | 321.54           | 302.22           | 834.78           |
| ACICU_00035      | hypothetical protein                            |                                  | 237.79           | 59.48            | 40.34            | 48.24            |
| ACICU_00083      | hypothetical protein                            |                                  | 286.26           | 415.67           | 404.01           | 331.30           |
| ACICU_00228      | dihydropteroate synthase                        |                                  | 821.00           | 980.70           | 951.78           | 1197.38          |
| ACICU_00684      | membrane protein                                | 4                                | 230.73           | 74.39            | 79.60            | 66.75            |
| ACICU_00741      | hypothetical protein                            |                                  | 95.08            | 153.45           | 174.54           | 420.04           |
| ACICU_00761      | trehalose-6-phosphate synthase                  | 3                                | 1574.45          | 188.64           | 178.62           | 103.85           |
| ACICU_00762      | trehalose phosphatase                           | 6                                | 135.09           | 15.34            | 11.82            | 4.97             |
| ACICU_00895      | hypothetical protein                            | 3                                | 183.33           | 18.65            | 8.71             | 10.64            |
| ACICU_00900      | polysaccharide deacetylase                      | 3                                | 482.46           | 968.13           | 963.54           | 4064.21          |
| ACICU_00901      | N-glycosyltransferase                           | 3                                | 580.01           | 752.05           | 723.96           | 2213.52          |
| ACICU_00902      | poly-beta-1,6-N-acetyl-D-glucosamine biosynth 2 |                                  | 190.83           | 418.05           | 319.71           | 976.08           |
| ACICU_00989      | CipA hypothetical protein                       |                                  | 4370.76          | 2439.45          | 2745.86          | 904.08           |
| ACICU_01003      | ATPase AAA                                      |                                  | 31.65            | 92.66            | 54.50            | 46.18            |
| ACICU_01198      | cysteine-rich helical bundle repeat protein     | 4                                | 2826.16          | 1019.86          | 1053.07          | 735.41           |
| ACICU_01214      | hypothetical protein                            | 3                                | 737.65           | 223.77           | 136.64           | 51.13            |
| ACICU_01215      | hypothetical protein                            | 3                                | 106.49           | 15.24            | 19.52            | 5.01             |
| ACICU_01216      | head morphogenesis protein                      | 3                                | 225.78           | 49.02            | 53.17            | 19.46            |
| ACICU_01253      | hypothetical protein                            |                                  | 15.83            | 114.46           | 111.13           | 126.28           |
| ACICU_01280      | alcohol dehydrogenase                           | 4                                | 144.50           | 10.52            | 14.19            | 6.69             |
| ACICU_01425      | hypothetical protein                            | 3                                | 3194.35          | 757.10           | 653.20           | 231.30           |
| ACICU_01426      | hydroperoxidase                                 | 3                                | 11358.19         | 2644.17          | 3174.74          | 1719.65          |
| ACICU_01514      | anthranilate synthase component II              |                                  | 193.55           | 447.06           | 800.41           | 412.96           |
| ACICU_01518      | hypothetical protein                            | 5                                | 411.94           | 649.52           | 856.19           | 3186.35          |
| ACICU_01552      | hypothetical protein                            | 5                                | 71.08            | 566.03           | 562.68           | 2939.18          |
| ACICU_01553      | hypothetical protein                            | 4                                | 25.35            | 46.63            | 35.95            | 190.39           |
| ACICU_01710      | hypothetical protein                            | 2                                | 1014.25          | 334.71           | 319.33           | 241.99           |
| ACICU_01717      | hypothetical protein                            |                                  | 56.12            | 26.03            | 26.17            | 9.49             |
| ACICU_01801      | hypothetical protein                            | 3                                | 54.68            | 13.72            | 15.12            | 4.41             |
| ACICU_01911      | hemagglutinin                                   | 3                                | 426.73           | 2731.51          | 2283.03          | 2544.38          |
| ACICU_01912      | hemolysin activator protein                     | 4                                | 97.31            | 963.46           | 748.41           | 1124.78          |
| ACICU_02040      | cytochrome d ubiquinol oxidase subunit 2        | 2                                | 3121.33          | 6905.46          | 8440.21          | 10989.49         |
| ACICU_02071      | hypothetical protein                            | 4                                | 148.76           | 17.68            | 21.78            | 8.29             |
| ACICU_02269      | DNA breaking-rejoining protein                  | 2                                | 37.64            | 2.87             | 4.20             | 3.37             |
| ACICU_02270      | hypothetical protein                            | 3                                | 632.01           | 115.55           | 125.67           | 101.83           |
| ACICU_02274      | hypothetical protein                            |                                  | 41.73            | 12.80            | 7.32             | 3.28             |
| ACICU_02275      | hypothetical protein                            | 2                                | 115.64           | 35.79            | 23.36            | 15.65            |
| ACICU_02276      | hypothetical protein                            | 4                                | 323.75           | 32.21            | 18.69            | 3.92             |
| ACICU_02406      | transporter                                     | 2                                | 336.56           | 150.89           | 168.28           | 81.43            |
| ACICU_02407      | aspartate aminotransferase                      | 2                                | 360.64           | 179.40           | 223.51           | 105.58           |
| ACICU_02431      | DNA-binding protein                             | 3                                | 560.24           | 82.85            | 86.42            | 41.06            |
| ACICU_02432      | glycosyl transferase                            | 3                                | 91.93            | 20.22            | 33.16            | 29.38            |
| ACICU_02433      | methyltransferase                               | 3                                | 64.82            | 12.31            | 7.48             | 10.64            |
| ACICU_02434      | LmbE protein                                    | 3                                | 100.90           | 22.66            | 14.79            | 23.82            |
| ACICU_02435      | acyl-CoA dehydrogenase                          | 3                                | 90.87            | 16.65            | 19.36            | 9.97             |
| ACICU_02436      | hypothetical protein                            | 3                                | 2237.99          | 400.91           | 378.42           | 335.88           |
| ACICU_02462      | cold-shock protein                              |                                  | 4735.85          | 3306.29          | 2884.37          | 1376.38          |
| ACICU_02527      | membrane protein                                | 2                                | 441.31           | 91.20            | 88.49            | 70.59            |
| ACICU_02697      | glycosyl transferase                            | 2                                | 782.77           | 349.30           | 280.38           | 239.77           |
| ACICU_02698      | hypothetical protein                            | 2                                | 518.10           | 245.41           | 174.60           | 155.91           |
| ACICU_02780      | permease                                        | 3                                | 45.16            | 50.10            | 73.82            | 72.42            |
| ACICU_02865      | hypothetical protein                            | 2                                | 43.33            | 77.54            | 58.52            | 332.90           |
| ACICU_02866      | glycosyl transferase family 2                   | 3                                | 11.68            | 34.97            | 27.85            | 388.76           |
| ACICU_02867      | polysaccharide biosynthesis protein GtrA        | 2                                | 0.72             | 4.07             | 6.36             | 60.10            |
| ACICU_02868      | dolichyl-phosphate-mannose-protein mannosyl     | 3                                | 24.24            | 33.02            | 28.80            | 293.49           |
| ACICU_02895      | peptide synthetase                              | 4                                | 107.93           | 409.81           | 411.70           | 2646.47          |

|             |                                              |   |          |          |          |          |
|-------------|----------------------------------------------|---|----------|----------|----------|----------|
| ACICU_02907 | diacylglycerol kinase                        | 3 | 24.18    | 78.78    | 73.84    | 291.83   |
| ACICU_03001 | hypothetical protein                         | 3 | 7.25     | 18.76    | 30.88    | 129.98   |
| ACICU_03002 | pmrB histidine kinase                        | 3 | 163.14   | 318.82   | 364.25   | 1457.18  |
| ACICU_03003 | pmrA transcriptional regulator               | 3 | 40.01    | 87.95    | 86.33    | 447.03   |
| ACICU_03004 | pmrC lipid A phosphoethanolamine transferase | 3 | 43.39    | 230.55   | 207.60   | 1450.73  |
| ACICU_03056 | entericidin                                  | 3 | 1177.17  | 336.17   | 433.98   | 352.07   |
| ACICU_03111 | peroxidase                                   | 4 | 1356.31  | 425.80   | 342.21   | 275.14   |
| ACICU_03287 | GTP-binding protein                          | 2 | 298.66   | 295.07   | 1154.12  | 676.23   |
| ACICU_03305 | DEAD/DEAH box helicase                       | 3 | 56817.89 | 52598.46 | 60091.13 | 29797.75 |
| ACICU_03382 | hypothetical protein                         |   | 124.63   | 94.45    | 71.82    | 116.77   |
| ACICU_03394 | pilus assembly protein PilM                  |   | 354.49   | 1239.47  | 1068.93  | 1296.71  |
| ACICU_03432 | hypothetical protein                         |   | 187.77   | 603.98   | 674.25   | 617.39   |
| ACICU_03447 | hypothetical protein                         | 4 | 276.00   | 52.60    | 58.77    | 61.14    |
| ACICU_03484 | MFS transporter                              |   | 506.10   | 945.52   | 823.13   | 1960.56  |
| ACICU_03514 | membrane protein                             | 2 | 6573.58  | 2515.17  | 2151.43  | 1943.72  |
| ACICU_03627 | membrane protein                             | 3 | 375.61   | 82.09    | 69.11    | 41.62    |
| RP84_13880  | conjugal transfer protein TraL               |   | 18.07    | 118.01   | 25.35    | 16.85    |
| RP84_13885  | hypothetical protein                         |   | 28.57    | 146.06   | 28.59    | 25.00    |
| RQ07_21540  | acetylornithine aminotransferase             |   | 68.96    | 86.28    | 7.29     | 29.47    |

## Patient 315

| <b>Locus Tag</b> | <b>Predicted Protein</b>                 | <b>DE in # of other patients</b> | <b>ABUH315100</b> | <b>ABUH315101</b> |
|------------------|------------------------------------------|----------------------------------|-------------------|-------------------|
| ACICU_00061      | oxidoreductase                           | 3                                | 35.50             | 127.92            |
| ACICU_00062      | fatty acid desaturase                    | 3                                | 83.11             | 208.10            |
| ACICU_00123      | amino acid dehydrogenase                 |                                  | 1160.68           | 2533.66           |
| ACICU_00124      | alanine racemase                         |                                  | 853.23            | 1280.98           |
| ACICU_00557      | hypothetical protein                     | 3                                | 327.89            | 101.42            |
| ACICU_00762      | trehalose phosphatase                    | 6                                | 29.02             | 165.51            |
| ACICU_00771      | hypothetical protein                     |                                  | 62.99             | 101.85            |
| ACICU_00895      | hypothetical protein                     | 3                                | 15.74             | 118.31            |
| ACICU_01280      | alcohol dehydrogenase                    | 4                                | 44.65             | 140.81            |
| ACICU_01423      | hypothetical protein                     | 4                                | 1067.71           | 5279.61           |
| ACICU_01447      | serine acetyltransferase                 |                                  | 119.57            | 49.13             |
| ACICU_01470      | transcriptional regulator                | 2                                | 54.70             | 189.95            |
| ACICU_01471      | hypothetical protein                     |                                  | 3.40              | 39.03             |
| ACICU_01472      | ubiquinol oxidase subunit II             |                                  | 122.46            | 2934.33           |
| ACICU_01473      | cytochrome D ubiquinol oxidase subunit I |                                  | 121.84            | 4010.43           |
| ACICU_01474      | hypothetical protein                     | 2                                | 310.67            | 2692.64           |
| ACICU_01475      | monooxygenase                            |                                  | 211.00            | 1002.98           |
| ACICU_01799      | peptidase                                |                                  | 449.84            | 270.19            |
| ACICU_01869      | ribose-phosphate pyrophosphokinase       |                                  | 49.90             | 83.40             |
| ACICU_01919      | amidase                                  |                                  | 2802.75           | 1866.40           |
| ACICU_03585      | hypothetical protein                     |                                  | 4642.87           | 1245.96           |
| ACICU_03598      | formimidoylglutamase                     |                                  | 73.86             | 182.92            |
| ACICU_03609      | aromatic amino acid transporter          | 2                                | 49.10             | 107.24            |
| ACICU_03610      | fumarylacetoacetase                      | 4                                | 351.46            | 952.46            |
| ACICU_03611      | maleylacetoacetate isomerase             |                                  | 89.33             | 234.77            |
| ACICU_03612      | glyoxalase                               | 2                                | 41.03             | 129.39            |
| ACICU_03614      | 4-hydroxyphenylpyruvate dioxygenase      | 3                                | 183.50            | 428.94            |
| RP84_02625       | terminase                                |                                  | 13.61             | 41.47             |
| RP84_02630       | hypothetical protein                     |                                  | 6.33              | 18.08             |
| RP84_02635       | hypothetical protein                     |                                  | 2.45              | 12.16             |
| RP84_02640       | phage capsid protein                     |                                  | 19.93             | 115.02            |
| RP84_02645       | hypothetical protein                     |                                  | 6.88              | 20.97             |
| RP84_02675       | hypothetical protein                     |                                  | 17.74             | 143.05            |

| Locus Tag   | Predicted Protein                               | DE in # of     |           |           |
|-------------|-------------------------------------------------|----------------|-----------|-----------|
|             |                                                 | other patients | ABUH34813 | ABUH34827 |
| ACICU_00093 | L-lactate permease                              | 2              | 4161.74   | 119.27    |
| ACICU_00094 | hypothetical protein                            | 2              | 1036.09   | 67.17     |
| ACICU_00095 | lactate dehydrogenase                           | 3              | 2433.22   | 160.84    |
| ACICU_00096 | lactate dehydrogenase                           | 2              | 1361.05   | 150.81    |
| ACICU_00265 | iron transporter                                |                | 412.29    | 116.41    |
| ACICU_00266 | iron transporter FeoB                           |                | 4027.76   | 1277.78   |
| ACICU_00463 | biopolymer transporter ExbB                     |                | 1475.56   | 384.00    |
| ACICU_00485 | ligand-gated channel protein                    |                | 1050.09   | 237.06    |
| ACICU_00557 | hypothetical protein                            | 3              | 109.42    | 380.33    |
| ACICU_00746 | hypothetical protein                            |                | 16.09     | 200.68    |
| ACICU_00747 | heme utilization protein                        |                | 79.53     | 472.62    |
| ACICU_00876 | hypothetical protein                            |                | 43.49     | 5.24      |
| ACICU_00942 | outer membrane receptor protein                 |                | 85.05     | 10.74     |
| ACICU_01101 | TonB-dependent receptor                         |                | 358.87    | 100.28    |
| ACICU_01109 | hypothetical protein                            | 2              | 70.56     | 257.00    |
| ACICU_01121 | hypothetical protein                            |                | 14.07     | 75.22     |
| ACICU_01271 | acetyl-CoA carboxylase                          | 2              | 1022.13   | 3313.12   |
| ACICU_01423 | hypothetical protein                            | 4              | 1117.22   | 3712.87   |
| ACICU_01518 | hypothetical protein                            | 5              | 1661.17   | 7298.17   |
| ACICU_01552 | hypothetical protein                            | 5              | 306.70    | 2054.96   |
| ACICU_01553 | hypothetical protein                            | 4              | 30.90     | 159.63    |
| ACICU_01672 | siderophore biosynthesis protein                |                | 2067.48   | 74.65     |
| ACICU_01673 | ornithine monooxygenase                         | 2              | 857.95    | 31.47     |
| ACICU_01674 | RND transporter                                 | 2              | 724.85    | 41.83     |
| ACICU_01675 | siderophore achromobactin biosy                 | 2              | 892.79    | 143.04    |
| ACICU_01676 | siderophore biosynthesis protein,               | 2              | 2289.10   | 174.88    |
| ACICU_01677 | (2Fe-2S)-binding protein                        | 2              | 95.11     | 14.21     |
| ACICU_01678 | dimethylmenaquinone methyltr                    | 2              | 123.44    | 25.03     |
| ACICU_01679 | ligand-gated channel protein                    | 2              | 10836.93  | 2145.19   |
| ACICU_01681 | peptidase                                       | 2              | 499.58    | 125.82    |
| ACICU_01683 | siderophore biosynthesis protein                | 2              | 1587.77   | 245.57    |
| ACICU_01727 | von Willebrand factor A                         |                | 1094.31   | 45.70     |
| ACICU_01728 | tryptophan synthase subunit beta                |                | 279.90    | 64.70     |
| ACICU_01790 | 2,3-dihydro-2,3-dihydroxybenzoate dehydrogenase |                | 127.05    | 8.83      |
| ACICU_01791 | 2,3-dihydro-2,3-dihydroxybenzoate synthetase    |                | 235.05    | 44.77     |
| ACICU_02262 | magnesium ABC transporter ATPase                |                | 505.69    | 127.86    |
| ACICU_02272 | porin                                           |                | 89.56     | 18.20     |
| ACICU_02408 | membrane protein                                | 2              | 6.39      | 25.78     |
| ACICU_02414 | protein CsuE                                    | 3              | 67.52     | 6.31      |
| ACICU_02415 | protein CsuD                                    | 3              | 45.78     | 3.92      |
| ACICU_02416 | protein CsuC                                    | 3              | 66.47     | 4.04      |
| ACICU_02417 | protein CsuB                                    | 3              | 31.01     | 1.18      |
| ACICU_02418 | protein CsuA                                    | 3              | 283.39    | 12.35     |
| ACICU_02420 | protein CsuA/B                                  | 3              | 3461.91   | 5.41      |
| ACICU_02421 | TetR family transcriptional regulator           |                | 75.54     | 0.50      |
| ACICU_02485 | hemin transporter HemP                          |                | 166.96    | 41.37     |
| ACICU_02570 | isochorismate synthase                          |                | 137.19    | 26.08     |

|             |                                                  |   |        |         |
|-------------|--------------------------------------------------|---|--------|---------|
| ACICU_02572 | thioesterase                                     |   | 44.14  | 5.90    |
| ACICU_02573 | ABC transporter                                  |   | 202.68 | 34.88   |
| ACICU_02574 | ABC transporter                                  |   | 131.88 | 20.12   |
| ACICU_02576 | histidine decarboxylase                          |   | 116.25 | 18.20   |
| ACICU_02577 | isochorismatase                                  |   | 69.08  | 8.88    |
| ACICU_02578 | enterobactin synthase subunit E                  |   | 212.01 | 23.55   |
| ACICU_02579 | peptide synthetase                               |   | 464.96 | 92.68   |
| ACICU_02580 | Rhizobactin siderophore biosynthesis protein Rhb |   | 119.48 | 25.55   |
| ACICU_02581 | ligand-gated channel protein                     |   | 352.56 | 52.53   |
| ACICU_02583 | iron ABC transporter ATP-binding protein         |   | 28.48  | 1.47    |
| ACICU_02584 | iron ABC transporter permease                    |   | 42.20  | 7.39    |
| ACICU_02585 | iron ABC transporter permease                    |   | 43.44  | 2.96    |
| ACICU_02587 | acinetobactin biosynthesis protein               |   | 338.35 | 33.33   |
| ACICU_02588 | peptide synthetase                               |   | 295.23 | 64.31   |
| ACICU_02589 | acinetobactin utilization protein                |   | 91.72  | 11.30   |
| ACICU_02895 | peptide synthetase                               | 4 | 623.66 | 2449.56 |
| ACICU_03051 | membrane protein                                 |   | 413.68 | 81.05   |
| ACICU_03521 | TonB-dependent receptor                          |   | 657.70 | 198.29  |
| ACICU_03537 | ligand-gated channel protein                     |   | 706.46 | 90.41   |

| Locus Tag   | Predicted Protein                           | DE in # of other |           |            |            |
|-------------|---------------------------------------------|------------------|-----------|------------|------------|
|             |                                             | patients         | ABUH41096 | ABUH410103 | ABUH410128 |
| ACICU_00061 | oxidoreductase                              | 3                | 110.53    | 18.48      | 103.03     |
| ACICU_00062 | fatty acid desaturase                       | 3                | 224.72    | 42.23      | 166.23     |
| ACICU_00093 | L-lactate permease                          | 2                | 941.16    | 49.25      | 701.15     |
| ACICU_00094 | hypothetical protein                        | 2                | 144.00    | 23.75      | 86.90      |
| ACICU_00095 | lactate dehydrogenase                       | 3                | 845.58    | 93.89      | 657.87     |
| ACICU_00096 | lactate dehydrogenase                       | 2                | 342.86    | 76.95      | 244.76     |
| ACICU_00318 | signal peptide-containing protein           |                  | 236.97    | 841.78     | 167.54     |
| ACICU_00543 | enoyl-ACP reductase                         |                  | 1670.30   | 7681.87    | 1736.95    |
| ACICU_00594 | acyl-CoA synthetase                         | 2                | 189.63    | 931.76     | 199.62     |
| ACICU_00608 | hypothetical protein                        |                  | 383.31    | 96.48      | 306.78     |
| ACICU_00612 | acetyl-CoA carboxylase                      |                  | 1732.17   | 7967.36    | 1554.10    |
| ACICU_00613 | tRNA(Ile)-lysidine synthetase               |                  | 67.03     | 278.91     | 74.95      |
| ACICU_00634 | aminobenzoate synthetase                    |                  | 48.16     | 30.48      | 42.67      |
| ACICU_00684 | membrane protein                            | 4                | 7726.14   | 13996.49   | 3453.64    |
| ACICU_00699 | hypothetical protein                        |                  | 166.48    | 243.35     | 207.50     |
| ACICU_00762 | trehalose phosphatase                       | 6                | 442.68    | 1817.25    | 376.68     |
| ACICU_00775 | ACP S-malonyltransferase                    |                  | 1352.74   | 4136.58    | 1375.29    |
| ACICU_00776 | 3-oxoacyl-ACP reductase                     |                  | 2027.13   | 6614.09    | 2105.02    |
| ACICU_00801 | LysR family transcriptional regulator       |                  | 29.90     | 86.74      | 34.57      |
| ACICU_00803 | transporter                                 |                  | 77.47     | 226.79     | 97.08      |
| ACICU_00804 | lipase                                      |                  | 25.19     | 73.50      | 24.21      |
| ACICU_00813 | 3-oxoacyl-ACP synthase                      |                  | 3580.61   | 11930.16   | 3521.67    |
| ACICU_00888 | choline dehydrogenase                       | 3                | 2064.73   | 915.62     | 563.67     |
| ACICU_01027 | hypothetical protein                        | 4                | 395.95    | 2376.17    | 446.16     |
| ACICU_01085 | amino acid transporter                      | 3                | 50.34     | 39.04      | 128.31     |
| ACICU_01102 | ribonuclease T                              |                  | 888.58    | 272.46     | 848.51     |
| ACICU_01103 | dihydroorotase                              |                  | 1317.27   | 410.41     | 1229.96    |
| ACICU_01116 | type VI secretion system protein            |                  | 1967.82   | 1637.53    | 2044.13    |
| ACICU_01135 | acetylornithine aminotransferase            |                  | 26.88     | 4.28       | 32.82      |
| ACICU_01136 | arginine N-succinyltransferase              |                  | 24.07     | 5.11       | 31.76      |
| ACICU_01163 | acyltransferase                             |                  | 11.46     | 46.39      | 13.22      |
| ACICU_01165 | protein disaggregation chaperone            |                  | 5795.53   | 19410.76   | 8685.27    |
| ACICU_01166 | damage-inducible protein CinA               |                  | 65.19     | 237.52     | 57.00      |
| ACICU_01167 | hypothetical protein                        |                  | 30.86     | 104.10     | 36.76      |
| ACICU_01169 | hypothetical protein                        |                  | 13.30     | 44.28      | 16.82      |
| ACICU_01177 | glutathione S-transferase                   |                  | 1143.15   | 3006.65    | 866.55     |
| ACICU_01179 | NADH dehydrogenase                          |                  | 1210.84   | 802.90     | 502.39     |
| ACICU_01180 | hypothetical protein                        |                  | 12.35     | 80.52      | 11.82      |
| ACICU_01181 | methyltransferase                           |                  | 152.90    | 1019.24    | 186.89     |
| ACICU_01182 | lysine tRNA synthetase                      |                  | 15.22     | 94.04      | 27.55      |
| ACICU_01186 | benzoate transporter                        |                  | 12.33     | 40.17      | 16.99      |
| ACICU_01198 | cysteine-rich helical bundle repeat protein | 4                | 5425.64   | 25340.09   | 5678.21    |
| ACICU_01199 | hypothetical protein                        |                  | 132.82    | 470.63     | 345.29     |
| ACICU_01221 | hypothetical protein                        | 3                | 1622.68   | 5428.87    | 1070.70    |
| ACICU_01222 | glycine zipper                              | 2                | 1068.91   | 2902.66    | 869.15     |
| ACICU_01261 | type VI secretion system protein            | 3                | 1453.41   | 1184.45    | 1207.69    |
| ACICU_01280 | alcohol dehydrogenase                       | 4                | 391.36    | 1857.81    | 314.99     |
| ACICU_01335 | enoyl-CoA hydratase                         |                  | 157.87    | 3756.35    | 263.44     |
| ACICU_01336 | ATPase AAA                                  |                  | 259.28    | 9968.04    | 586.70     |
| ACICU_01337 | phenylacetate-CoA oxygenase                 |                  | 17.54     | 620.34     | 33.57      |
| ACICU_01338 | phenylacetic acid degradation protein       |                  | 133.60    | 4888.35    | 236.80     |
| ACICU_01339 | phenylacetate-CoA oxygenase                 |                  | 105.25    | 4325.21    | 238.07     |

|             |                                                     |   |         |          |         |
|-------------|-----------------------------------------------------|---|---------|----------|---------|
| ACICU_01340 | phenylacetic acid degradation protein               |   | 80.88   | 2365.92  | 123.71  |
| ACICU_01341 | 2,3-dehydroadipyl-CoA hydratase                     |   | 24.72   | 526.92   | 29.46   |
| ACICU_01342 | enoyl-CoA hydratase                                 |   | 76.73   | 925.95   | 91.24   |
| ACICU_01343 | 3-hydroxyacyl-CoA dehydrogenase                     |   | 76.21   | 1459.09  | 124.49  |
| ACICU_01344 | beta-ketoadipyl CoA thiolase                        |   | 49.08   | 652.52   | 68.75   |
| ACICU_01345 | phenylacetate--CoA ligase                           | 2 | 91.87   | 573.11   | 93.43   |
| ACICU_01404 | thioesterase                                        |   | 74.63   | 801.19   | 61.11   |
| ACICU_01405 | MFS transporter                                     |   | 3175.20 | 10423.55 | 3778.76 |
| ACICU_01406 | LysR family transcriptional regulator               |   | 20.97   | 102.92   | 31.85   |
| ACICU_01419 | hypothetical protein                                |   | 14.20   | 63.88    | 3.02    |
| ACICU_01424 | damage-inducible protein CinA                       |   | 14.30   | 61.91    | 12.04   |
| ACICU_01427 | short-chain dehydrogenase                           | 3 | 1413.51 | 2908.48  | 854.53  |
| ACICU_01428 | hypothetical protein                                |   | 15.72   | 183.56   | 18.95   |
| ACICU_01430 | hypothetical protein                                |   | 29.11   | 92.56    | 24.68   |
| ACICU_01541 | LysR family transcriptional regulator               |   | 40.90   | 149.41   | 37.85   |
| ACICU_01554 | biotin synthase                                     |   | 780.85  | 2252.06  | 678.45  |
| ACICU_01571 | hypothetical protein                                |   | 74.88   | 183.70   | 36.32   |
| ACICU_01585 | ArsR family transcriptional regulator               |   | 24.37   | 37.69    | 7.29    |
| ACICU_01625 | AraC family transcriptional regulator               |   | 83.21   | 400.36   | 72.11   |
| ACICU_01626 | ATPase                                              |   | 1764.35 | 4344.81  | 1480.86 |
| ACICU_01670 | hypothetical protein                                |   | 62.32   | 194.02   | 66.35   |
| ACICU_01673 | ornithine monooxygenase                             | 2 | 196.35  | 46.51    | 31.63   |
| ACICU_01674 | RND transporter                                     | 2 | 142.08  | 49.69    | 32.90   |
| ACICU_01675 | siderophore achromobactin biosynthesis protein AcsC | 2 | 680.65  | 199.19   | 145.86  |
| ACICU_01676 | siderophore biosynthesis protein, lucA/lucC family  | 2 | 928.10  | 195.60   | 206.50  |
| ACICU_01677 | (2Fe-2S)-binding protein                            | 2 | 104.70  | 27.13    | 10.97   |
| ACICU_01678 | dimethylmenaquinone methyltransferase               | 2 | 184.33  | 28.31    | 34.92   |
| ACICU_01679 | ligand-gated channel protein                        | 2 | 4987.20 | 449.47   | 462.00  |
| ACICU_01680 | hypothetical protein                                |   | 24.67   | 3.65     | 3.78    |
| ACICU_01681 | peptidase                                           | 2 | 519.15  | 76.07    | 77.13   |
| ACICU_01682 | hypothetical protein                                |   | 52.34   | 11.49    | 7.44    |
| ACICU_01683 | siderophore biosynthesis protein                    | 2 | 4419.32 | 109.42   | 80.95   |
| ACICU_01684 | haloacid dehalogenase                               |   | 6750.51 | 2144.09  | 961.45  |
| ACICU_01708 | hypothetical protein                                |   | 526.14  | 1434.53  | 381.15  |
| ACICU_01805 | hypothetical protein                                | 4 | 113.32  | 310.02   | 77.42   |
| ACICU_01813 | pilus assembly protein fimA                         | 2 | 197.83  | 79.49    | 441.67  |
| ACICU_01825 | adeA membrane fusion protein                        | 3 | 529.79  | 156.19   | 354.78  |
| ACICU_01912 | hemolysin activator protein                         | 4 | 123.54  | 38.11    | 156.12  |
| ACICU_02071 | hypothetical protein                                | 4 | 161.78  | 574.86   | 138.12  |
| ACICU_02088 | UDP-N-acetylglucosamine acyltransferase             |   | 1798.03 | 5047.68  | 1724.59 |
| ACICU_02089 | 3-hydroxyacyl-ACP dehydratase                       |   | 1045.03 | 4248.45  | 884.39  |
| ACICU_02135 | 3-dehydroquinate dehydratase                        |   | 84.42   | 227.72   | 55.96   |
| ACICU_02276 | hypothetical protein                                | 4 | 330.14  | 1038.01  | 169.63  |
| ACICU_02289 | hypothetical protein                                | 2 | 133.33  | 595.01   | 181.84  |
| ACICU_02359 | hypothetical protein                                |   | 67.92   | 142.58   | 244.57  |
| ACICU_02381 | hypothetical protein                                |   | 141.95  | 424.46   | 147.94  |
| ACICU_02382 | hypothetical protein                                |   | 273.61  | 703.36   | 314.89  |
| ACICU_02414 | protein CsuE                                        | 3 | 48.93   | 9.72     | 238.53  |
| ACICU_02415 | protein CsuD                                        | 3 | 50.13   | 9.76     | 211.13  |
| ACICU_02416 | protein CsuC                                        | 3 | 75.42   | 19.15    | 348.73  |
| ACICU_02417 | protein CsuB                                        | 3 | 66.76   | 21.14    | 242.33  |
| ACICU_02418 | protein CsuA                                        | 3 | 132.44  | 45.37    | 1107.43 |
| ACICU_02420 | protein CsuA/B                                      | 3 | 1093.49 | 188.06   | 4190.64 |
| ACICU_02538 | RNA methyltransferase                               |   | 156.57  | 57.71    | 124.07  |
| ACICU_02653 | ABC transporter permease                            |   | 234.33  | 83.49    | 276.64  |

|             |                                                       |   |          |          |          |
|-------------|-------------------------------------------------------|---|----------|----------|----------|
| ACICU_02654 | phosphonate ABC transporter substrate-binding protein | 3 | 244.86   | 69.86    | 298.67   |
| ACICU_02655 | aromatic amino acid transporter                       |   | 14.28    | 149.86   | 623.82   |
| ACICU_02656 | pyruvate decarboxylase                                |   | 126.28   | 3964.05  | 286.76   |
| ACICU_02657 | AsnC family transcriptional regulator                 |   | 21.40    | 106.76   | 25.86    |
| ACICU_02658 | aldehyde dehydrogenase                                |   | 1036.93  | 6063.72  | 1384.53  |
| ACICU_03000 | ammonium transporter                                  | 3 | 106.80   | 43.04    | 163.45   |
| ACICU_03007 | acyltransferase                                       |   | 64.21    | 381.62   | 96.30    |
| ACICU_03111 | peroxidase                                            | 4 | 1468.43  | 3968.29  | 1507.26  |
| ACICU_03116 | acetyl-CoA carboxyl transferase                       |   | 1667.98  | 4572.37  | 1817.98  |
| ACICU_03117 | tryptophan synthase subunit alpha                     |   | 1923.65  | 5118.40  | 2012.47  |
| ACICU_03305 | DEAD/DEAH box helicase                                | 3 | 48506.38 | 15940.68 | 44948.25 |
| ACICU_03337 | hypothetical protein                                  |   | 337.20   | 1470.80  | 307.38   |
| ACICU_03422 | sulfate permease                                      | 4 | 253.60   | 420.27   | 157.92   |
| ACICU_03447 | hypothetical protein                                  | 4 | 415.08   | 1211.43  | 547.93   |
| ACICU_03493 | membrane protein                                      | 2 | 1867.96  | 548.55   | 2498.35  |
| ACICU_03499 | hypothetical protein                                  |   | 1338.57  | 10853.84 | 1435.36  |
| ACICU_03602 | urocanate hydratase                                   |   | 1181.45  | 664.84   | 2625.06  |

| Locus Tag   | Predicted Protein                           | DE in # of other |            |            |            |
|-------------|---------------------------------------------|------------------|------------|------------|------------|
|             |                                             | patients         | ABUH475197 | ABUH475239 | ABUH475361 |
| ACICU_00106 | membrane protein                            |                  | 33.54      | 75.68      | 78.63      |
| ACICU_00115 | short-chain dehydrogenase                   |                  | 3.47       | 28.20      | 6.68       |
| ACICU_00126 | amino acid transporter                      |                  | 325.28     | 1057.97    | 740.46     |
| ACICU_00164 | malate dehydrogenase                        |                  | 1204.24    | 3451.77    | 2051.53    |
| ACICU_00166 | threonine transporter RhtB                  |                  | 75.22      | 147.15     | 83.46      |
| ACICU_00312 | heat shock protein 90                       |                  | 457.98     | 1456.85    | 1198.13    |
| ACICU_00319 | hypothetical protein                        |                  | 41.24      | 14.33      | 63.48      |
| ACICU_00345 | general secretion pathway protein GspE      |                  | 121.03     | 382.23     | 150.86     |
| ACICU_00494 | phosphogluconate dehydratase                |                  | 3117.79    | 1291.55    | 4286.18    |
| ACICU_00495 | 2-dehydro-3-deoxyphosphogluconate aldolase  |                  | 1149.54    | 372.58     | 1960.77    |
| ACICU_00496 | gluconate permease                          |                  | 1989.21    | 645.84     | 2875.81    |
| ACICU_00498 | aldehyde dehydrogenase                      |                  | 2080.72    | 622.92     | 2939.91    |
| ACICU_00557 | hypothetical protein                        | 3                | 62.87      | 21.92      | 141.22     |
| ACICU_00571 | NAD(P) transhydrogenase subunit alpha       | 2                | 558.06     | 128.59     | 250.25     |
| ACICU_00684 | membrane protein                            | 4                | 230.09     | 112.40     | 952.72     |
| ACICU_00738 | hypothetical protein                        |                  | 4404.70    | 943.87     | 4356.16    |
| ACICU_00760 | ABC transporter permease                    |                  | 1012.76    | 234.57     | 663.57     |
| ACICU_00761 | trehalose-6-phosphate synthase              | 3                | 2027.08    | 85.98      | 1522.33    |
| ACICU_00762 | trehalose phosphatase                       | 6                | 99.77      | 2.57       | 49.89      |
| ACICU_00861 | gamma-glutamyltransferase                   | 2                | 236.95     | 150.43     | 234.33     |
| ACICU_00888 | choline dehydrogenase                       | 3                | 9317.77    | 885.73     | 1888.35    |
| ACICU_00889 | betaine-aldehyde dehydrogenase              | 2                | 11644.49   | 1682.94    | 3344.85    |
| ACICU_00890 | BetI family transcriptional regulator       | 2                | 2263.86    | 574.01     | 781.37     |
| ACICU_00891 | choline transporter                         | 2                | 1763.25    | 345.00     | 623.84     |
| ACICU_00895 | hypothetical protein                        | 3                | 133.56     | 57.25      | 239.32     |
| ACICU_00969 | copper resistance protein NlpE              |                  | 4618.98    | 1198.21    | 3285.10    |
| ACICU_01023 | hypothetical protein                        |                  | 92.11      | 62.42      | 0.00       |
| ACICU_01027 | hypothetical protein                        | 4                | 77.17      | 14.20      | 0.00       |
| ACICU_01035 | head morphogenesis protein                  |                  | 39.00      | 33.44      | 9.53       |
| ACICU_01085 | amino acid transporter                      | 3                | 42.01      | 142.60     | 41.21      |
| ACICU_01109 | hypothetical protein                        | 2                | 107.12     | 30.42      | 152.04     |
| ACICU_01119 | Sel1 repeat protein                         |                  | 139.38     | 66.78      | 229.09     |
| ACICU_01172 | membrane protein                            |                  | 556.68     | 578.12     | 2537.02    |
| ACICU_01193 | LysR family transcriptional regulator       |                  | 342.49     | 142.70     | 110.46     |
| ACICU_01194 | heavy metal transporter                     |                  | 233.75     | 96.56      | 67.73      |
| ACICU_01195 | ATPase                                      |                  | 1604.53    | 562.63     | 481.21     |
| ACICU_01198 | cysteine-rich helical bundle repeat protein | 4                | 4256.00    | 703.07     | 2645.40    |
| ACICU_01210 | cold-shock protein                          |                  | 162.90     | 4.18       | 32.94      |
| ACICU_01214 | hypothetical protein                        | 3                | 508.74     | 70.09      | 150.38     |
| ACICU_01215 | hypothetical protein                        | 3                | 132.22     | 8.12       | 100.96     |
| ACICU_01216 | head morphogenesis protein                  | 3                | 215.08     | 13.07      | 153.00     |
| ACICU_01221 | hypothetical protein                        | 3                | 350.96     | 8.75       | 155.51     |
| ACICU_01222 | glycine zipper                              | 2                | 191.12     | 32.67      | 153.45     |
| ACICU_01260 | beta-lactamase                              |                  | 86.83      | 30.57      | 113.19     |
| ACICU_01261 | type VI secretion system protein            | 3                | 475.43     | 246.88     | 522.61     |
| ACICU_01266 | membrane protein                            | 2                | 546.90     | 3155.72    | 1144.42    |
| ACICU_01267 | LamB/YcsF family protein                    |                  | 310.19     | 1609.47    | 635.83     |
| ACICU_01268 | hypothetical protein                        | 2                | 470.51     | 2647.33    | 1202.37    |
| ACICU_01270 | allophanate hydrolase                       | 2                | 271.01     | 2139.74    | 655.12     |
| ACICU_01271 | acetyl-CoA carboxylase                      | 2                | 855.58     | 4292.96    | 1611.48    |
| ACICU_01280 | alcohol dehydrogenase                       | 4                | 142.74     | 11.72      | 55.87      |
| ACICU_01322 | hemolysin                                   |                  | 260.55     | 80.19      | 108.28     |
| ACICU_01345 | phenylacetate--CoA ligase                   | 2                | 230.29     | 1312.26    | 370.60     |
| ACICU_01348 | phenylacetic acid degradation protein       |                  | 11.56      | 58.05      | 25.04      |
| ACICU_01420 | hypothetical protein                        | 2                | 82.42      | 7.43       | 21.94      |
| ACICU_01421 | hypothetical protein                        | 2                | 76.99      | 6.42       | 24.45      |
| ACICU_01422 | hypothetical protein                        | 2                | 5481.71    | 27.66      | 1234.39    |

|             |                                            |   |          |          |         |
|-------------|--------------------------------------------|---|----------|----------|---------|
| ACICU_01423 | hypothetical protein                       | 4 | 3801.38  | 21.49    | 868.53  |
| ACICU_01425 | hypothetical protein                       | 3 | 3468.22  | 119.48   | 1271.90 |
| ACICU_01426 | hydroperoxidase                            | 3 | 13638.11 | 504.34   | 8828.25 |
| ACICU_01427 | short-chain dehydrogenase                  | 3 | 512.04   | 16.29    | 100.00  |
| ACICU_01429 | stress-induced protein                     |   | 3946.64  | 49.22    | 788.20  |
| ACICU_01474 | hypothetical protein                       | 2 | 478.62   | 152.37   | 161.20  |
| ACICU_01498 | NADH dehydrogenase                         |   | 240.89   | 227.64   | 183.22  |
| ACICU_01591 | hypothetical protein                       |   | 51.16    | 56.58    | 13.96   |
| ACICU_01623 | membrane protein                           |   | 153.37   | 65.71    | 155.59  |
| ACICU_01710 | hypothetical protein                       | 2 | 827.68   | 171.29   | 517.00  |
| ACICU_01721 | hypothetical protein                       |   | 490.78   | 159.27   | 533.65  |
| ACICU_01800 | hypothetical protein                       |   | 337.29   | 22.64    | 159.98  |
| ACICU_01801 | hypothetical protein                       | 3 | 57.47    | 2.48     | 22.49   |
| ACICU_01805 | hypothetical protein                       | 4 | 22.57    | 0.00     | 15.29   |
| ACICU_01806 | catalase                                   |   | 369.96   | 92.45    | 346.82  |
| ACICU_01807 | phage capsid and scaffold protein          |   | 300.27   | 94.65    | 377.06  |
| ACICU_01911 | hemagglutinin                              | 3 | 467.32   | 1784.45  | 663.81  |
| ACICU_01912 | hemolysin activator protein                | 4 | 127.49   | 696.80   | 270.04  |
| ACICU_01935 | alpha/beta hydrolase                       | 2 | 3226.77  | 1007.08  | 2936.00 |
| ACICU_01936 | acetoacetate decarboxylase                 | 2 | 110.47   | 31.25    | 60.23   |
| ACICU_01971 | aromatic-ring-hydroxylating dioxygenase    |   | 5.86     | 38.15    | 4.58    |
| ACICU_01972 | Rieske (2Fe-2S) protein                    | 2 | 37.92    | 94.34    | 22.79   |
| ACICU_01975 | acyl-CoA dehydrogenase                     | 2 | 16.69    | 70.89    | 15.92   |
| ACICU_01976 | glutamyl-tRNA amidotransferase             | 3 | 103.74   | 196.98   | 58.46   |
| ACICU_02040 | cytochrome d ubiquinol oxidase subunit 2   | 2 | 3371.74  | 12764.95 | 8175.98 |
| ACICU_02043 | hypothetical protein                       |   | 35.82    | 89.66    | 16.99   |
| ACICU_02071 | hypothetical protein                       | 4 | 113.80   | 12.79    | 25.56   |
| ACICU_02073 | serine protease                            |   | 319.11   | 76.12    | 369.64  |
| ACICU_02080 | hypothetical protein                       |   | 58.70    | 9.28     | 31.28   |
| ACICU_02192 | hypothetical protein                       |   | 37.84    | 36.76    | 0.00    |
| ACICU_02193 | hypothetical protein                       |   | 30.18    | 36.41    | 0.00    |
| ACICU_02196 | hypothetical protein                       |   | 33.54    | 24.31    | 0.00    |
| ACICU_02236 | hypothetical protein                       |   | 708.72   | 216.02   | 1555.68 |
| ACICU_02269 | DNA breaking-rejoining protein             | 2 | 30.78    | 0.44     | 10.23   |
| ACICU_02270 | hypothetical protein                       | 3 | 518.26   | 80.05    | 263.79  |
| ACICU_02275 | hypothetical protein                       | 2 | 108.17   | 10.88    | 65.70   |
| ACICU_02276 | hypothetical protein                       | 4 | 258.71   | 3.60     | 29.99   |
| ACICU_02327 | hypothetical protein                       |   | 42.47    | 10.25    | 49.97   |
| ACICU_02400 | sorbosone dehydrogenase                    |   | 443.89   | 118.90   | 278.86  |
| ACICU_02406 | transporter                                | 2 | 371.61   | 24.37    | 235.58  |
| ACICU_02407 | aspartate aminotransferase                 | 2 | 490.79   | 26.20    | 297.15  |
| ACICU_02408 | membrane protein                           | 2 | 16.66    | 4.53     | 18.44   |
| ACICU_02412 | glycine/betaine ABC transporter            |   | 41.63    | 15.43    | 52.63   |
| ACICU_02413 | hypothetical protein                       |   | 6.16     | 5.88     | 20.53   |
| ACICU_02414 | protein CsuE                               | 3 | 16.75    | 5.45     | 18.85   |
| ACICU_02415 | protein CsuD                               | 3 | 9.96     | 2.68     | 9.32    |
| ACICU_02416 | protein CsuC                               | 3 | 10.49    | 3.27     | 9.55    |
| ACICU_02417 | protein CsuB                               | 3 | 9.72     | 1.71     | 6.29    |
| ACICU_02418 | protein CsuA                               | 3 | 43.22    | 5.62     | 35.26   |
| ACICU_02420 | protein CsuA/B                             | 3 | 185.01   | 23.16    | 163.42  |
| ACICU_02429 | membrane protein                           |   | 55.12    | 4.61     | 20.02   |
| ACICU_02431 | DNA-binding protein                        | 3 | 535.01   | 32.29    | 167.85  |
| ACICU_02432 | glycosyl transferase                       | 3 | 135.28   | 12.29    | 105.58  |
| ACICU_02433 | methyltransferase                          | 3 | 63.37    | 10.02    | 65.40   |
| ACICU_02434 | LmbE protein                               | 3 | 85.22    | 10.16    | 91.29   |
| ACICU_02435 | acyl-CoA dehydrogenase                     | 3 | 65.70    | 11.66    | 55.06   |
| ACICU_02436 | hypothetical protein                       | 3 | 1920.95  | 55.22    | 1224.18 |
| ACICU_02527 | membrane protein                           | 2 | 468.20   | 108.62   | 295.71  |
| ACICU_02566 | hypothetical protein                       |   | 1740.81  | 1220.45  | 3651.59 |
| ACICU_02654 | phosphonate ABC transporter substrate-bin3 | 3 | 200.29   | 473.62   | 132.36  |

|             |                                           |   |         |         |         |
|-------------|-------------------------------------------|---|---------|---------|---------|
| ACICU_02695 | membrane protein                          | 2 | 81.80   | 7.15    | 49.41   |
| ACICU_02696 | membrane protein                          | 2 | 218.98  | 56.62   | 144.95  |
| ACICU_02697 | glycosyl transferase                      | 2 | 616.69  | 174.91  | 422.67  |
| ACICU_02698 | hypothetical protein                      | 2 | 425.82  | 102.70  | 305.49  |
| ACICU_02783 | hypothetical protein                      |   | 62.30   | 202.27  | 111.42  |
| ACICU_02910 | hypothetical protein                      |   | 2621.47 | 1075.14 | 1438.25 |
| ACICU_02946 | hemagglutinin                             |   | 1527.93 | 653.46  | 2773.93 |
| ACICU_02962 | hypothetical protein                      |   | 20.18   | 82.27   | 56.76   |
| ACICU_02966 | hypothetical protein                      |   | 21.59   | 4.96    | 24.23   |
| ACICU_03000 | ammonium transporter                      | 3 | 125.56  | 32.58   | 84.24   |
| ACICU_03056 | entericidin                               | 3 | 756.72  | 234.94  | 553.29  |
| ACICU_03061 | twitching motility protein PilT           |   | 52.30   | 164.34  | 54.07   |
| ACICU_03062 | chemotaxis protein CheY                   |   | 45.04   | 164.70  | 54.51   |
| ACICU_03092 | glyoxalase                                |   | 111.26  | 22.70   | 151.16  |
| ACICU_03111 | peroxidase                                | 4 | 1153.45 | 228.14  | 506.09  |
| ACICU_03132 | hypothetical protein                      | 2 | 28.65   | 52.17   | 8.75    |
| ACICU_03336 | amino acid transporter                    |   | 529.69  | 165.48  | 352.88  |
| ACICU_03355 | hemerythrin                               |   | 540.47  | 97.79   | 418.57  |
| ACICU_03418 | Sel1 repeat protein                       |   | 636.43  | 189.09  | 344.56  |
| ACICU_03422 | sulfate permease                          | 4 | 190.73  | 55.80   | 372.96  |
| ACICU_03447 | hypothetical protein                      | 4 | 348.55  | 87.97   | 409.67  |
| ACICU_03514 | membrane protein                          | 2 | 5101.62 | 1558.20 | 2501.46 |
| ACICU_03522 | membrane protein                          |   | 69.26   | 40.83   | 12.04   |
| ACICU_03576 | ABC transporter substrate-binding protein |   | 173.84  | 18.56   | 159.58  |
| ACICU_03605 | acyltransferase                           |   | 74.36   | 5.98    | 53.33   |
| ACICU_03610 | fumarylacetoacetase                       | 4 | 493.28  | 366.08  | 121.65  |
| ACICU_03614 | 4-hydroxyphenylpyruvate dioxygenase       | 3 | 195.05  | 414.21  | 111.09  |
| ACICU_03627 | membrane protein                          | 3 | 267.53  | 29.50   | 94.65   |

## Patient 588

| Locus Tag   | Predicted Protein                        | DE in # of other |            |            |
|-------------|------------------------------------------|------------------|------------|------------|
|             |                                          | patients         | ABUH588656 | ABUH588663 |
| ACICU_00400 | 50S ribosomal protein L31                |                  | 152.85     | 1093.76    |
| ACICU_00900 | polysaccharide deacetylase               | 3                | 546.07     | 2243.68    |
| ACICU_00901 | N-glycosyltransferase                    | 3                | 327.98     | 1164.10    |
| ACICU_00902 | poly-beta-1,6-N-acetyl-D-glucosamine   2 |                  | 97.79      | 446.81     |
| ACICU_01072 | lipid A phosphoethanolamine transferase  |                  | 10.72      | 137.04     |
| ACICU_01518 | hypothetical protein                     | 5                | 94.52      | 8068.90    |
| ACICU_01552 | hypothetical protein                     | 5                | 13.98      | 5087.33    |
| ACICU_01553 | hypothetical protein                     | 4                | 17.14      | 265.15     |
| ACICU_02488 | hypothetical protein                     | 2                | 548.35     | 3528.93    |
| ACICU_02552 | peptidase M24                            |                  | 548.96     | 1846.54    |
| ACICU_02780 | permease                                 | 3                | 32.17      | 68.32      |
| ACICU_02813 | carO, membrane protein                   |                  | 1268.95    | 10391.19   |
| ACICU_02865 | hypothetical protein                     | 2                | 46.79      | 218.88     |
| ACICU_02866 | glycosyl transferase family 2            | 3                | 6.05       | 280.17     |
| ACICU_02867 | polysaccharide biosynthesis protein Gt 2 |                  | 0.99       | 45.68      |
| ACICU_02868 | dolichyl-phosphate-mannose-protein n 3   |                  | 19.40      | 267.72     |
| ACICU_02895 | peptide synthetase                       | 4                | 59.89      | 2817.19    |
| ACICU_02907 | diacylglycerol kinase                    | 3                | 23.56      | 242.22     |
| ACICU_03001 | hypothetical protein                     | 3                | 8.65       | 128.04     |
| ACICU_03002 | pmrB histidine kinase                    | 3                | 274.07     | 959.10     |
| ACICU_03003 | pmrA transcriptional regulator           | 3                | 49.60      | 302.11     |
| ACICU_03004 | pmrC lipid A phosphoethanolamine tra 3   |                  | 29.49      | 923.92     |
| ACICU_03142 | TonB-dependent receptor                  |                  | 145.78     | 882.83     |
| ACICU_03305 | DEAD/DEAH box helicase                   | 3                | 6926.19    | 9866.88    |
| ACICU_03422 | sulfate permease                         | 4                | 825.26     | 2828.73    |
| ACICU_03608 | peptidase M15                            |                  | 18.79      | 114.67     |
