# Supplementary material for: Transcriptome Remodeling of Acinetobacter baumannii during Infection and Treatment
Source: PubMed Central journal article supplement (PMC5340874; doi:10.1128/mbio.02193-16), 2017-03-07
Supplement: mbo001173221st2.pdf [file mbo001173221st2.pdf]

Table S2. SNV summary table

## Patient Specific

| Patient     | Locus       | Strains    | Mutation                          | ACICU coordinate                       |                                                       |                                        |
|-------------|-------------|------------|-----------------------------------|----------------------------------------|-------------------------------------------------------|----------------------------------------|
|             |             |            |                                   | (CP000863.1)                           | Predicted Annotation                                  |                                        |
| 66          | ACICU_01593 | ABUH66241  | D330V                             | 1705134                                | predicted peptidylprolyl isomerase                    |                                        |
|             | ACICU_01187 |            | V435D                             | 1292944                                | predicted MFS transporter                             |                                        |
|             | IG          |            |                                   |                                        |                                                       |                                        |
|             | ACICU_03134 | ABUH66253  | L435H                             | 3336320                                | predicted acyl-CoA dehydrogenase                      |                                        |
|             | ACICU_03653 |            | E29A                              | 3878791                                | hypothetical protein                                  |                                        |
|             | ACICU_03047 |            | K95I                              | 3237437                                | P-nitrobenzoate reductase NfnB                        |                                        |
|             | ACICU_01827 |            | D167N                             | 1953791                                | histidine kinase AdeS                                 |                                        |
|             | ACICU_03002 |            | S17R                              | 3190434                                | PmrB                                                  |                                        |
|             | ACICU_01157 |            | A138G                             | 1258634                                | predicted adenylosuccinate synthase                   |                                        |
|             | ACICU_01739 |            | A127V                             | 1853419                                | predicted dehydrogenase                               |                                        |
|             | ACICU_02177 |            | Q85H                              | 2316655                                | hypothetical protein                                  |                                        |
|             | ACICU_03477 |            | ABUH66276                         | A254V                                  | 3684991                                               | predicted 4-aminobutyrate transaminase |
|             | ACICU_03495 |            |                                   | Q164Stop                               | 3706656                                               | predicted ion channel membrane protein |
|             | ACICU_03498 | T57I       | 3709718                           | histidine kinase                       |                                                       |                                        |
|             | ACICU_00089 | synonymous | 97031                             | UDP-glucose 6-dehydrogenase, Ugd       |                                                       |                                        |
|             | ACICU_01827 | R313S      | 1954231                           | histidine kinase AdeS                  |                                                       |                                        |
|             | ACICU_01674 | P72L       | 1788182                           | predicted MFS transporter              |                                                       |                                        |
|             | ACICU_00303 | D525V      | 327973                            | RNA polymerase, beta subunit RpoB      |                                                       |                                        |
|             | ACICU_02683 | synonymous | 2853732                           | predicted MFS transporter              |                                                       |                                        |
|             | ACICU_02085 | A80T       | 2221632                           | RecA                                   |                                                       |                                        |
| IG          | IG          |            | intergenic at 2272424             |                                        |                                                       |                                        |
| ACICU_02039 | L428Q       | 2179008    | cytochrome bd-type quinol oxidase |                                        |                                                       |                                        |
| ACICU_02495 | R197C       | 2634918    | predicted protease                |                                        |                                                       |                                        |
| 81          | ACICU_00804 | ABUH81366  | synonymous                        | 897417                                 | synonymous at 897086                                  |                                        |
|             | ACICU_01826 |            | A80P                              | 1952756                                | response regulator AdeR                               |                                        |
|             | ACICU_02988 | Q729Stop   | 3174596                           | cation/multidrug efflux pump AdeJ      |                                                       |                                        |
|             | ACICU_00681 | ABUH81389  | insertion, frameshift at 627AA    | 754646                                 | predicted restriction endonuclease                    |                                        |
|             | IG          |            | IG                                |                                        | intergenic at 1499725                                 |                                        |
| ACICU_03326 | ABUH81452   | synonymous | 3527672                           | predicted lipoprotein                  |                                                       |                                        |
| 280         | ACICU_03002 | ABUH28081  | L94Q                              | 3190204                                | PmrB                                                  |                                        |
|             | ACICU_02317 |            | K127I                             | 2445774                                | ribosomal small subunit pseudouridine synthase A RsuA |                                        |
|             | ACICU_01889 | ABUH28099  | synonymous                        | 2010317                                | predicted MFS transporter                             |                                        |
|             | ACICU_03002 |            | L257I                             | 3189716                                | PmrB                                                  |                                        |
| 315         | ACICU_03157 | ABUH315100 | W261L                             | 3360002                                | histidine kinase                                      |                                        |
|             | ACICU_01399 |            | Q319H                             | 1504884                                | predicted porin                                       |                                        |
|             | ACICU_00546 | ABUH315101 | synonymous                        | 597683                                 | MacA                                                  |                                        |
|             | ACICU_01470 |            | N90K                              | 1579686                                | transcriptional regulator                             |                                        |
| 348         | V427_0076   | ABUH34813  | H128Y                             |                                        | hypothetical protein                                  |                                        |
|             | ACICU_00253 |            | LR55C                             | 274453                                 | LPS export ABC transporter permease LptF              |                                        |
|             | ACICU_00266 |            | L9P                               | 289416                                 | iron transporter FeoB                                 |                                        |
|             | ACICU_03230 | K124Stop   | 3441077                           | hypothetical lipoprotein               |                                                       |                                        |
|             | ACICU_01602 | ABUH34827  | K41N                              | 1714042                                | lipid A export permease MsbA                          |                                        |
|             | ACICU_01308 |            | L303Q                             | 1414709                                | ACICU_01308 L303Q T65S inner membrane protein         |                                        |
|             | IG          |            | IG                                |                                        | intergenic                                            |                                        |
|             |             |            |                                   |                                        |                                                       |                                        |
| 410         | none        |            |                                   |                                        |                                                       |                                        |
| 475         | ACICU_03157 | ABUH475239 | G413Stop                          | 3359547                                | histidine kinase                                      |                                        |
|             | ACICU_00071 |            | P541H                             | 78574                                  | Wcz chain length determinant, tyrosine kinase         |                                        |
|             | ACICU_01128 | V338I      | 1225351                           | predicted glycine/D-amino acid oxidase |                                                       |                                        |
| 588         | ACICU_02689 | ABUH588656 | T383S                             | 2859017                                | predicted monomeric isocitrate dehydrogenase          |                                        |
|             | ACICU_01096 |            | synonymous                        | 1188586                                | predicted transporter                                 |                                        |
|             | ACICU_03484 | A241V      | 3692163                           | predicted MFS transporter              |                                                       |                                        |
|             | ACICU_00706 | synonymous | 793755                            | histidine kinase                       |                                                       |                                        |
|             | ACICU_00170 | ABUH588663 | P28L                              | 193257                                 | predicted periplasmic metal binding protein family    |                                        |
|             | ACICU_03002 |            | E229D                             | 3189798                                | PmrB                                                  |                                        |
|             | ACICU_03002 |            | Q247L                             | 3189745                                | PmrB                                                  |                                        |

## Patient Restricted

| Patient     | Locus          | Strains                         | Mutation               | ACICU coordinate |                                         |                                       |
|-------------|----------------|---------------------------------|------------------------|------------------|-----------------------------------------|---------------------------------------|
|             |                |                                 |                        | (CP000863.1)     | Predicted Annotation                    |                                       |
| 66          | ACICU_00712    | ABUH66253, ABUH66276            | I82F                   | 800157           | NADH:ubiquinone oxidoreductase 24kD sub |                                       |
|             | ACICU_00071    | ABUH66268, ABUH66271            | P542L                  | 78574            | Wcz chain length determinant            |                                       |
|             | ACICU_00410    | ABUH66268, ABUH66271            | L18F                   | 453415           | ribonuclease E/G Rne                    |                                       |
|             | IG             | ABUH66268, ABUH66271, ABUH66276 | IG                     | 2527549          | intergenic                              |                                       |
| 81          | up ACICU_01825 | ABUH81389, ABUH81452            | 5bp del at -40         | 1952412          | deletion at -40 from AdeA               |                                       |
|             | ACICU_03189    | ABUH81389, ABUH81452            | L50Q                   | 3396646          | predicted phosphohydrolase              |                                       |
|             | ACICU_00166    | ABUH81389, ABUH81452            | A24V                   | 190418           | predicted amino acid efflux             |                                       |
|             | ACICU_01391    | ABUH81389, ABUH81452            | G310S                  | 1495608          | acetyl-CoA C-acetyltransferase          |                                       |
|             | ACICU_03002    | ABUH81389, ABUH81452            | T115I                  | 3190141          | PmrB                                    |                                       |
|             | 280            | ACICU_03063                     | ABUH28092, ABUH28099   | K114Stop         | 3257978                                 | pilus assembly protein PilG           |
| ACICU_00705 |                | ABUH28092, ABUH28093, ABUH28099 | C70S                   | 792284           | transcriptional regulator               |                                       |
| ACICU_00545 |                | ABUH28092, ABUH28093            | V328W                  | 595540           | MacB ABC-type efflux pump               |                                       |
| ACICU_02581 |                | ABUH28092, ABUH28093, ABUH28099 | A100T                  | 2737785          | acetinobactin receptor BauA             |                                       |
| ACICU_03002 |                | ABUH28092, ABUH28093, ABUH28099 | V31F                   | 3190394          | PmrB                                    |                                       |
| ACICU_02130 |                | ABUH28092, ABUH28099            | G286V                  | 2267550          | nitrate reductase NirD                  |                                       |
| ACICU_01494 |                | ABUH28092, ABUH28099            | I183N                  | 1602946          | arsenic resistance ArsB                 |                                       |
| ACICU_01494 |                | ABUH28092, ABUH28099            | L191F                  | 1602971          | arsenic resistance ArsB                 |                                       |
| 410         |                | ACICU_03027                     | ABUH410103, ABUH410108 | 1bp deletion     | 3217412                                 | hypothetical protein                  |
|             |                | ACICU_03387                     | ABUH410103, ABUH410108 | 1bp deletion     | 3593806                                 | signal peptide conserved hypothetical |
