# Supplementary material for: Transcriptome Remodeling of Acinetobacter baumannii during Infection and Treatment
Source: PubMed Central journal article supplement (PMC5340874; doi:10.1128/mbio.02193-16), 2017-03-07
Supplement: mbo001173221st3.pdf [file mbo001173221st3.pdf]

Table S3. Isolate-specific insertion sequence summary

| gene_before | gene_after  | in_gene     | orientation | element           | ABUH588656 | ABUH588663 | ABUH34813 | ABUH34827 | ABUH66241 | ABUH66253 | ABUH66268 | ABUH66271 | ABUH66276 | ABUH28081 | ABUH28092 | ABUH28093 | ABUH28099 | ABUH475197 | ABUH475239 | ABUH475361 | ABUH315100 | ABUH315101 | ABUH41096 | ABUH410103 | ABUH410128 | ABUH81366 | ABUH81389 | ABUH81452 |   |
|-------------|-------------|-------------|-------------|-------------------|------------|------------|-----------|-----------|-----------|-----------|-----------|-----------|-----------|-----------|-----------|-----------|-----------|------------|------------|------------|------------|------------|-----------|------------|------------|-----------|-----------|-----------|---|
| ACICU_00086 | ACICU_00087 |             | R           | IS <i>Aba</i> 125 |            |            |           |           |           |           |           |           | 1         |           |           |           |           |            |            |            |            |            |           |            |            |           |           |           |   |
| ACICU_00288 | ACICU_00289 |             | R           | IS <i>Aba</i> 125 |            |            |           |           |           |           |           |           |           |           |           |           |           |            | 1          |            |            |            |           |            |            |           |           |           |   |
| ACICU_00288 | ACICU_00289 |             | F           | IS <i>Aba</i> 12  |            |            |           | 1         |           |           |           |           |           |           |           |           |           |            |            |            |            |            |           |            |            |           |           |           |   |
|             |             | ACICU_00555 | F           | IS <i>Aba</i> 125 |            |            | 1         |           |           |           |           |           |           |           |           |           |           |            |            |            |            |            |           |            |            |           |           |           |   |
|             |             | ACICU_00745 | R           | IS <i>Aba</i> 125 |            |            | 1         |           |           |           |           |           |           |           |           |           |           |            |            |            |            |            |           |            |            |           |           |           |   |
| ACICU_01103 | ACICU_01104 |             | F           | IS <i>Aba</i> 1   |            |            |           |           |           |           |           |           |           |           |           |           |           |            |            |            |            |            |           |            | 1          |           |           |           |   |
| ACICU_01551 | ACICU_01552 |             | F           | IS <i>Aba</i> 27  |            |            |           |           |           |           |           |           |           |           |           |           |           |            |            |            |            |            |           |            |            |           |           |           |   |
|             |             | ACICU_01720 | F           | IS <i>Aba</i> 125 |            |            |           |           |           |           |           |           |           |           |           |           |           |            |            |            |            |            |           |            |            |           |           |           |   |
|             |             | ACICU_01765 | F           | IS <i>Aba</i> 1   |            |            |           |           |           |           |           |           | 1         |           |           |           |           |            |            |            |            |            |           |            |            |           |           |           |   |
| ACICU_01839 | ACICU_01840 |             | R           | IS <i>Aba</i> 27  |            |            | 1         |           |           |           |           |           |           |           |           |           |           |            |            |            |            |            |           |            |            |           |           |           |   |
| ACICU_02073 | ACICU_02074 |             | R           | IS <i>Aba</i> 27  | 1          |            |           |           |           |           |           |           |           |           |           |           |           |            |            |            |            |            |           |            |            |           |           |           |   |
| ACICU_02243 | ACICU_02244 |             | R           | IS <i>Aba</i> 27  |            |            | 1         |           |           |           |           |           |           |           |           |           |           |            |            |            |            |            |           |            |            |           |           |           |   |
| ACICU_02408 | ACICU_02409 |             | F           | IS <i>Aba</i> 125 |            |            |           | 1         |           |           |           |           |           |           |           |           |           |            |            |            |            |            |           |            |            |           |           |           |   |
| ACICU_02420 | ACICU_02421 |             | F           | IS <i>Aba</i> 1   |            |            |           |           |           |           |           |           |           |           |           |           |           |            |            |            |            |            |           |            |            | 1         |           |           |   |
|             |             | ACICU_02421 | F           | IS <i>Aba</i> 12  |            |            |           |           |           |           |           |           |           |           |           |           |           |            |            |            |            |            |           |            |            |           |           |           |   |
|             |             | ACICU_02538 | F           | IS <i>Aba</i> 125 |            |            |           |           |           |           |           |           |           |           |           |           |           |            |            |            |            |            |           |            |            |           |           |           |   |
|             |             | ACICU_02613 | R           | IS <i>Aba</i> 125 |            |            |           |           |           |           |           |           |           |           |           |           |           |            |            |            |            |            |           |            |            |           |           |           |   |
| ACICU_02685 | ACICU_02686 |             | F           | IS <i>Aba</i> 27  |            |            | 1         |           |           |           |           |           |           |           |           |           |           |            |            |            |            |            |           |            |            |           |           |           |   |
|             |             | ACICU_02813 | R           | IS <i>Aba</i> 27  | 1          |            |           |           |           |           |           |           |           |           |           |           |           |            |            |            |            |            |           |            |            |           |           |           |   |
|             |             | ACICU_02910 | R           | IS <i>Aba</i> 125 |            |            |           |           |           |           |           |           |           |           |           |           |           |            |            |            |            |            |           |            |            |           |           |           |   |
|             |             | ACICU_03345 | F           | IS <i>Aba</i> 1   |            |            |           |           |           |           |           |           | 1         |           |           |           |           |            |            |            |            |            |           |            |            |           |           |           |   |
|             |             | ACICU_03355 | R           | IS <i>Aba</i> 1   |            |            |           |           |           |           |           |           |           |           |           |           |           |            |            |            |            |            |           |            |            |           |           |           |   |
|             |             | ACICU_03472 | R           | IS <i>Aba</i> 125 |            |            |           |           |           |           |           |           |           |           |           |           |           |            |            |            |            |            |           |            |            |           |           |           |   |
|             |             | ACICU_03611 | F           | IS <i>Aba</i> 125 |            |            |           |           |           |           |           |           |           |           |           |           |           |            |            |            |            |            |           |            |            |           | 1         |           | 1 |
