# Supplementary material for: Transcriptome Remodeling of Acinetobacter baumannii during Infection and Treatment
Source: PubMed Central journal article supplement (PMC5340874; doi:10.1128/mbio.02193-16), 2017-03-07
Supplement: mbo001173221st6.pdf [file mbo001173221st6.pdf]

Table S6. *crp* and *osmC* expression values and predicted copy number of composite transposon

| clade                                                            | A                                                                                    |            |           |           |           |           |           |           |           |            |            |            | B                                  |           |           |           |           | C         |           |            |            | D                      |           |           |
|------------------------------------------------------------------|--------------------------------------------------------------------------------------|------------|-----------|-----------|-----------|-----------|-----------|-----------|-----------|------------|------------|------------|------------------------------------|-----------|-----------|-----------|-----------|-----------|-----------|------------|------------|------------------------|-----------|-----------|
| locus tag                                                        | ABUH315100                                                                           | ABUH315101 | ABUH81366 | ABUH81389 | ABUH81452 | ABUH28081 | ABUH28092 | ABUH28093 | ABUH28099 | ABUH475197 | ABUH475239 | ABUH475361 | ABUH66241                          | ABUH66253 | ABUH66268 | ABUH66271 | ABUH66276 | ABUH41096 | ABUH41093 | ABUH410128 | ABUH588656 | ABUH588663             | ABUH34813 | ABUH34827 |
| predicted annotation                                             |                                                                                      |            |           |           |           |           |           |           |           |            |            |            |                                    |           |           |           |           |           |           |            |            |                        |           |           |
| ACICU_01161*                                                     | 617.1                                                                                | 501.3      | 758.7     | 466.0     | 665.2     | 565.3     | 828.6     | 981.4     | 703.1     | 791.5      | 1112.4     | 1340.4     | 276.2                              | 415.1     | 287.8     | 350.3     | 313.5     | 239.5     | 571.8     | 323.3      | 340.3      | 247.3                  | 360.2     | 287.8     |
| ACICU_01162                                                      | 420.4                                                                                | 401.6      | 539.1     | 351.8     | 352.8     | 471.7     | 576.3     | 757.2     | 606.5     | 594.5      | 542.8      | 657.3      | 203.7                              | 219.7     | 200.6     | 248.7     | 185.3     | 161.1     | 332.8     | 229.3      | 119.9      | 171.6                  | 207.5     | 169.1     |
| ISAb <sub>a</sub> 1 status                                       | ISAb <sub>a</sub> 1 in ACICU_01161 and ISAb <sub>a</sub> 1 downstream of ACICU_01162 |            |           |           |           |           |           |           |           |            |            |            | ISAb <sub>a</sub> 1 in ACICU_01161 |           |           |           |           |           |           |            |            | no ISAb <sub>a</sub> 1 |           |           |
| predicted number of <i>crp</i> and <i>osmC</i> transposon copies | 2                                                                                    | 2          | 2         | 2         | 2         | 3         | 3         | 3         | 3         | 3          | 3          | 3          | 0                                  | 0         | 0         | 0         | 0         | 0         | 0         | 0          | 0          | 0                      | 0         | 0         |

\*mean normalized read counts from DESeq2
