# Supplementary material for: Transcriptome Remodeling of Acinetobacter baumannii during Infection and Treatment
Source: mBio. 2017 Mar 7;8(2):e02193-16. doi: 10.1128/mBio.02193-16 (PMC5340874; doi:10.1128/mBio.02193-16)
Supplement: TABLE S4 [file mbo001173221st4.pdf]

| Clade       |                                               |                                      |                     | A          |            |           |           |           |           |            |            |            |            | B          |            |           |           |           | C         |           |           |            |            | D          |            |           |           |
|-------------|-----------------------------------------------|--------------------------------------|---------------------|------------|------------|-----------|-----------|-----------|-----------|------------|------------|------------|------------|------------|------------|-----------|-----------|-----------|-----------|-----------|-----------|------------|------------|------------|------------|-----------|-----------|
|             |                                               |                                      |                     | ABUH315100 | ABUH315101 | ABUH28081 | ABUH28092 | ABUH28093 | ABUH28099 | ABUH475197 | ABUH475239 | ABUH475361 | ABUH481366 | ABUH481389 | ABUH481452 | ABUH66241 | ABUH66253 | ABUH66268 | ABUH66271 | ABUH66276 | ABUH41096 | ABUH410103 | ABUH410128 | ABUH588656 | ABUH588663 | ABUH34813 | ABUH34827 |
| Locus Tag   | predicted annotation                          | specific genetic event               | type of change      |            |            |           |           |           |           |            |            |            |            |            |            |           |           |           |           |           |           |            |            |            |            |           |           |
| ACICU_00306 | hypothetical protein                          |                                      |                     | 1.5        | 0.7        | 1.6       | 1.3       | 0.0       | 0.0       | 0.4        | 1.7        | 2.2        | 5.8        | 10.4       | 7.0        | 3.0       | 1.2       | 5.8       | 1.7       | 1.2       | 8.9       | 7.6        | 12.4       | 19.7       | 41.9       | 17.2      | 21.5      |
| ACICU_00307 | hot-dog fold hypothetical protein             | ISAbat1 in ACICU_00307, clade C      | insertion sequence  | 47.8       | 62.0       | 35.2      | 48.4      | 49.1      | 52.4      | 40.4       | 26.8       | 43.1       | 84.2       | 73.7       | 67.7       | 45.1      | 47.9      | 50.0      | 73.5      | 39.4      | 420.2     | 392.5      | 468.1      | 463.2      | 415.7      | 52.1      | 48.0      |
| ACICU_00384 | tRNA-binding protein                          | none ID                              |                     | 136.9      | 98.2       | 93.5      | 99.1      | 91.3      | 107.0     | 127.1      | 62.2       | 131.5      | 244.1      | 220.6      | 266.5      | 172.9     | 155.5     | 130.7     | 225.2     | 257.1     | 135.6     | 183.3      | 304.2      | 193.9      | 195.0      | 425.6     | 584.3     |
| ACICU_00450 | PF03729 repeat protein                        | none ID                              |                     | 44.8       | 67.0       | 44.3      | 31.9      | 27.2      | 29.3      | 37.5       | 25.2       | 28.0       | 67.6       | 156.4      | 187.0      | 216.9     | 70.5      | 58.5      | 82.8      | 120.9     | 82.0      | 109.5      | 183.3      | 192.4      | 233.8      | 342.7     | 356.4     |
| ACICU_00471 | prolipoprotein diacylglycerol transferase     | none ID                              |                     | 27.3       | 34.7       | 36.7      | 29.1      | 25.9      | 33.0      | 25.2       | 52.9       | 32.3       | 48.0       | 62.3       | 68.2       | 27.2      | 30.5      | 36.7      | 21.8      | 26.8      | 120.5     | 90.4       | 99.6       | 118.6      | 95.6       | 108.3     | 104.5     |
| ACICU_00545 | malic acid transporter                        |                                      |                     | 51.5       | 45.6       | 39.6      | 49.7      | 49.9      | 56.6      | 42.3       | 39.9       | 57.5       | 37.0       | 39.0       | 37.4       | 117.0     | 46.1      | 54.5      | 49.0      | 55.3      | 35.8      | 28.6       | 40.5       | 33.3       | 57.7       | 10.7      | 8.0       |
| ACICU_00546 | secretion protein HylD                        | ISAbat2 in clade D                   | insertion sequence  | 58.0       | 58.8       | 36.4      | 56.2      | 51.1      | 60.5      | 54.3       | 49.6       | 54.0       | 56.0       | 47.5       | 46.0       | 108.7     | 50.1      | 49.3      | 50.8      | 63.8      | 45.9      | 39.6       | 54.6       | 51.2       | 61.0       | 22.8      | 29.8      |
| ACICU_00684 | membrane protein                              | clade C has G to A @761268, start    | intergenic mutation | 26.4       | 32.2       | 19.3      | 6.6       | 7.3       | 6.4       | 19.7       | 10.5       | 95.9       | 259.5      | 242.3      | 327.8      | 113.1     | 68.6      | 62.9      | 45.1      | 8.2       | 707.4     | 1250.5     | 351.6      | 421.5      | 931.1      | 147.4     | 119.9     |
| ACICU_00708 | diguanylate cyclase                           | upstream mutation in -40 common t    | intergenic mutation | 24.6       | 19.7       | 13.8      | 21.5      | 26.0      | 27.9      | 17.2       | 26.5       | 23.8       | 19.5       | 18.9       | 15.9       | 305.3     | 230.8     | 213.0     | 198.4     | 342.6     | 11.9      | 11.2       | 20.7       | 14.8       | 19.0       | 19.6      | 23.8      |
| ACICU_00728 | hypothetical protein                          | none ID                              |                     | 113.3      | 83.7       | 88.4      | 45.1      | 59.7      | 76.4      | 94.6       | 61.8       | 152.0      | 427.4      | 472.0      | 591.5      | 283.7     | 187.0     | 340.6     | 229.1     | 104.3     | 1100.0    | 963.7      | 1092.9     | 1174.5     | 1632.3     | 1311.0    | 1218.5    |
| ACICU_00823 | leucyl/phenylalanyl-tRNA--protein transferase | ISAbat1 upstream                     | insertion sequence  | 54.8       | 50.5       | 46.9      | 45.1      | 50.6      | 50.4      | 47.8       | 46.9       | 62.3       | 64.0       | 65.7       | 62.9       | 68.5      | 61.8      | 44.7      | 55.5      | 64.4      | 45.4      | 46.9       | 54.3       | 59.2       | 61.6       | 189.8     | 217.0     |
| ACICU_00872 | transcriptional regulator                     | sequence variation (adjacent to hem) | sequence variation  | 24.7       | 17.7       | 21.0      | 23.6      | 23.7      | 21.5      | 24.4       | 30.8       | 25.0       | 17.2       | 11.7       | 14.1       | 9.9       | 11.4      | 9.0       | 8.9       | 10.5      | 11.2      | 15.8       | 15.6       | 13.3       | 21.1       | 41.0      | 46.1      |
| ACICU_01188 | benzoate transporter                          | ISAbat1 in ACICU_01189               | insertion sequence  | 3.4        | 3.0        | 4.4       | 3.1       | 4.2       | 5.4       | 3.8        | 5.5        | 3.9        | 5.1        | 5.3        | 4.2        | 4.9       | 4.8       | 3.6       | 2.5       | 4.9       | 36.9      | 58.3       | 23.1       | 5.3        | 5.1        | 5.2       | 6.8       |
| ACICU_01199 | hypothetical protein                          | none ID                              |                     | 84.5       | 143.0      | 127.2     | 93.4      | 99.3      | 101.3     | 100.6      | 67.6       | 107.5      | 442.6      | 1070.4     | 905.6      | 19        |           |           |           |           |           |            |            |            |            |           |           |

|                    |    |
|--------------------|----|
| intergenic         | 3  |
| insertion sequence | 19 |
| sequence variation | 8  |
