# Supplementary material for: Transcriptome Remodeling of Acinetobacter baumannii during Infection and Treatment
Source: mBio. 2017 Mar 7;8(2):e02193-16. doi: 10.1128/mBio.02193-16 (PMC5340874; doi:10.1128/mBio.02193-16)
Supplement: TABLE S5 [file mbo001173221st5.pdf]

Table S5. The most variably expressed core genes among isolates

| Locus Tag   | also variable among clades? | predicted annotation                        | specific gene event                                                   | type of change      | A          |            |            |            |            |            |            |            |            |           | B         |           |           |           |           |           |           |           |            |            | C          |            |           |           |  |  |  |  |  |  | D |  |  |  |  |  |  |  |  |  |
|-------------|-----------------------------|---------------------------------------------|-----------------------------------------------------------------------|---------------------|------------|------------|------------|------------|------------|------------|------------|------------|------------|-----------|-----------|-----------|-----------|-----------|-----------|-----------|-----------|-----------|------------|------------|------------|------------|-----------|-----------|--|--|--|--|--|--|---|--|--|--|--|--|--|--|--|--|
|             |                             |                                             |                                                                       |                     | ABUH315100 | ABUH315101 | ABUH200301 | ABUH200902 | ABUH200903 | ABUH200909 | ABUH475197 | ABUH475239 | ABUH475361 | ABUH41366 | ABUH41389 | ABUH41452 | ABUH66241 | ABUH66253 | ABUH66269 | ABUH66271 | ABUH66276 | ABUH41096 | ABUH410103 | ABUH410128 | ABUH598656 | ABUH598663 | ABUH34813 | ABUH34827 |  |  |  |  |  |  |   |  |  |  |  |  |  |  |  |  |
| ACICU_00072 |                             | wcb, protein tyrosine phosphatase           | sequence variation                                                    | sequence variation  | 611.0      | 560.7      | 483.6      | 439.7      | 582.6      | 494.4      | 552.8      | 405.3      | 676.9      | 913.7     | 1060.9    | 1301.5    | 651.7     | 716.4     | 549.7     | 723.0     | 393.2     | 1226.6    | 1292.4     | 1082.3     | 19.3       | 9.2        | 73.2      | 86.8      |  |  |  |  |  |  |   |  |  |  |  |  |  |  |  |  |
| ACICU_00087 |                             | UDP-galactose phosphate transferase         | ISAbat125 between ACICU_00086-87 in 66276                             | insertion sequence  | 379.1      | 335.6      | 327.0      | 385.7      | 397.4      | 331.2      | 336.6      | 309.2      | 476.9      | 319.6     | 282.8     | 296.8     | 415.0     | 343.7     | 301.9     | 355.6     | 278.3     | 327.3     | 331.0      | 294.6      | 777.3      | 649.6      | 4.2       | 3.9       |  |  |  |  |  |  |   |  |  |  |  |  |  |  |  |  |
| ACICU_00093 |                             | L-lactate permease                          | None ID                                                               | none identified     | 205.9      | 161.3      | 194.0      | 156.6      | 197.7      | 191.0      | 165.8      | 101.7      | 204.2      | 119.2     | 263.2     | 208.3     | 122.6     | 52.8      | 191.5     | 138.2     | 118.8     | 151.3     | 7.7        | 12.8       | 14.6       | 18.5       | 771.3     | 22.4      |  |  |  |  |  |  |   |  |  |  |  |  |  |  |  |  |
| ACICU_00094 |                             | hypothetical protein                        |                                                                       |                     | 62.0       | 42.2       | 67.8       | 42.2       | 68.2       | 48.6       | 50.9       | 49.7       | 59.0       | 43.5      | 64.4      | 47.7      | 23.9      | 23.0      | 55.8      | 39.2      | 26.4      | 51.1      | 8.2        | 35.1       | 62.5       | 106.9      | 422.5     | 27.9      |  |  |  |  |  |  |   |  |  |  |  |  |  |  |  |  |
| ACICU_00095 |                             | lactate dehydrogenase                       |                                                                       |                     | 285.8      | 167.5      | 177.2      | 140.4      | 215.1      | 237.6      | 178.2      | 203.7      | 333.2      | 176.1     | 326.6     | 287.0     | 219.5     | 89.7      | 306.1     | 214.1     | 160.1     | 196.3     | 21.3       | 173.9      | 41.2       | 68.5       | 649.7     | 43.5      |  |  |  |  |  |  |   |  |  |  |  |  |  |  |  |  |
| ACICU_00278 |                             | RND transporter                             | None ID                                                               | none identified     | 18.7       | 14.5       | 14.1       | 11.4       | 14.0       | 16.9       | 13.2       | 30.2       | 23.2       | 68.2      | 59.4      | 76.8      | 22.7      | 18.9      | 21.7      | 18.5      | 11.6      | 47.7      | 61.0       | 70.6       | 88.0       | 84.7       | 74.9      | 59.2      |  |  |  |  |  |  |   |  |  |  |  |  |  |  |  |  |
| ACICU_00290 |                             | Type II general secretory pathway protein   | None ID                                                               | none identified     | 26.0       | 10.7       | 10.1       | 12.6       | 11.7       | 19.4       | 12.6       | 31.5       | 23.1       | 67.3      | 60.9      | 74.0      | 14.7      | 17.0      | 26.2      | 15.3      | 15.9      | 79.7      | 51.8       | 87.6       | 68.6       | 97.2       | 89.2      | 86.3      |  |  |  |  |  |  |   |  |  |  |  |  |  |  |  |  |
| ACICU_00306 |                             | Y hypothetical protein                      | ISAbat1 in middle of 00307, P410 and P588                             | insertion sequence  | 1.5        | 0.7        | 1.6        | 1.3        | 0.0        | 0.0        | 0.4        | 1.7        | 2.2        | 5.8       | 10.4      | 7.0       | 3.0       | 1.2       | 5.8       | 1.7       | 1.2       | 8.9       | 7.6        | 12.4       | 19.7       | 41.9       | 17.2      | 21.5      |  |  |  |  |  |  |   |  |  |  |  |  |  |  |  |  |
| ACICU_00307 |                             | Y hot-dog fold hypothetical protein         |                                                                       |                     | 47.8       | 62.0       | 35.2       | 48.4       | 49.1       | 52.4       | 40.4       | 26.8       | 43.1       | 84.2      | 73.7      | 67.7      | 45.1      | 47.9      | 50.0      | 73.5      | 39.4      | 420.2     | 392.5      | 468.1      | 463.2      | 415.7      | 52.1      | 48.0      |  |  |  |  |  |  |   |  |  |  |  |  |  |  |  |  |
| ACICU_00318 |                             | signal peptide-containing protein           | None ID                                                               | none identified     | 14.0       | 30.0       | 19.6       | 7.8        | 9.3        | 15.2       | 24.1       | 7.0        | 17.5       | 81.3      | 60.2      | 74.2      | 80.9      | 39.1      | 35.2      | 38.5      | 21.4      | 113.5     | 390.1      | 90.0       | 202.1      | 70.6       | 40.1      | 37.3      |  |  |  |  |  |  |   |  |  |  |  |  |  |  |  |  |
| ACICU_00450 |                             | Y PF03729 repeat protein                    | None ID                                                               |                     | 44.8       | 67.0       | 44.3       | 31.9       | 27.2       | 29.3       | 37.5       | 25.2       | 28.0       | 67.6      | 156.4     | 187.0     | 216.9     | 70.5      | 58.5      | 82.9      | 120.9     | 82.0      | 109.5      | 183.3      | 126.4      | 233.8      | 342.7     | 356.4     |  |  |  |  |  |  |   |  |  |  |  |  |  |  |  |  |
| ACICU_00601 |                             | 50S ribosomal protein L20                   | None ID                                                               |                     | 4900.1     | 4407.9     | 5056.6     | 5532.0     | 3446.9     | 4514.3     | 3663.8     | 4711.4     | 3678.9     | 1682.1    | 1752.1    | 1688.5    | 2239.7    | 3906.2    | 4562.9    | 4088.6    | 3632.4    | 1672.2    | 1446.1     | 204.5      | 1111.8     | 947.6      | 1141.2    | 1833.2    |  |  |  |  |  |  |   |  |  |  |  |  |  |  |  |  |
| ACICU_00621 |                             | organic hydroperoxide resistance protein    | TtoG at -46 between transR and this gene                              | intergenic mutation | 25.7       | 57.1       | 75.5       | 34.5       | 27.5       | 28.4       | 33.4       | 16.9       | 36.6       | 98.1      | 85.2      | 80.8      | 38.4      | 40.3      | 44.3      | 33.9      | 40.0      | 398.0     | 399.6      | 382.3      | 216.6      | 199.1      | 80.0      | 52.4      |  |  |  |  |  |  |   |  |  |  |  |  |  |  |  |  |
| ACICU_00684 |                             | Y membrane protein                          | clade C has G to A @761268, start is at 761264, ACICU has upstream    | intergenic mutation | 26.4       | 32.2       | 19.3       | 6.6        | 7.3        | 6.4        | 19.7       | 10.5       | 95.0       | 299.5     | 242.3     | 327.8     | 113.1     | 68.6      | 62.9      | 45.1      | 8.2       | 707.4     | 1250.5     | 351.6      | 421.5      | 931.1      | 147.4     | 119.9     |  |  |  |  |  |  |   |  |  |  |  |  |  |  |  |  |
| ACICU_00708 |                             | Y diguanylate cyclase                       | upstream mutation in -40 common to clade B                            | intergenic mutation | 24.6       | 19.7       | 13.8       | 21.5       | 26.0       | 27.9       | 17.2       | 26.5       | 23.8       | 19.5      | 18.9      | 25.9      | 305.4     | 230.8     | 213.0     | 198.4     | 342.6     | 11.9      | 11.2       | 20.7       | 14.8       | 19.0       | 19.6      | 23.8      |  |  |  |  |  |  |   |  |  |  |  |  |  |  |  |  |
| ACICU_00728 |                             | Y hypothetical protein                      | None ID                                                               | none identified     | 113.3      | 83.7       | 88.4       | 45.1       | 59.7       | 76.4       | 94.6       | 61.8       | 152.0      | 427.4     | 472.0     | 591.5     | 283.7     | 187.0     | 340.6     | 229.1     | 104.4     | 1100.0    | 963.7      | 1092.9     | 1174.5     | 1632.3     | 1311.0    | 1218.5    |  |  |  |  |  |  |   |  |  |  |  |  |  |  |  |  |
| ACICU_00761 |                             | trehalose-6-phosphate synthase              | None ID                                                               | none identified     | 166.1      | 371.4      | 270.6      | 34.1       | 33.4       | 20.5       | 25.4       | 16.4       | 31.0       | 675.2     | 534.2     | 981.1     | 1821.6    | 835.2     | 537.1     | 595.6     | 103.6     | 1173.9    | 3097.2     | 1152.9     | 1518.0     | 923.0      | 568.8     | 445.5     |  |  |  |  |  |  |   |  |  |  |  |  |  |  |  |  |
| ACICU_00782 |                             | trehalose phosphatase                       |                                                                       |                     | 9.2        | 48.6       | 37.9       | 4.5        | 3.6        | 1.6        | 28.3       | 0.8        | 16.7       | 18.1      | 35.8      | 84.5      | 180.0     | 81.8      | 22.0      | 35.6      | 7.4       | 134.6     | 537.4      | 128.0      | 174.9      | 60.7       | 36.9      | 35.7      |  |  |  |  |  |  |   |  |  |  |  |  |  |  |  |  |
| ACICU_00839 |                             | acetylglutamate kinase                      | None ID                                                               | none identified     | 88.0       | 54.1       | 66.1       | 34.4       | 38.4       | 47.5       | 39.9       | 99.1       | 84.4       | 191.6     | 236.0     | 256.1     | 131.5     | 99.4      | 133.7     | 78.1      | 49.8      | 297.0     | 278.3      | 248.2      | 239.9      | 353.3      | 276.4     | 289.1     |  |  |  |  |  |  |   |  |  |  |  |  |  |  |  |  |
| ACICU_00881 |                             | hypothetical protein                        | sequence variation, associated with hemO recombinant region           | sequence variation  | 27.5       | 17.0       | 8.1        | 12.9       | 12.1       | 11.4       | 3.8        | 5.5        | 3.9        | 1.5       | 1.8       | 2.2       | 1.5       | 0.7       | 3.6       | 2.5       | 4.9       | 36.9      | 58.5       | 23.1       | 5.3        | 5.1        | 5.2       | 6.8       |  |  |  |  |  |  |   |  |  |  |  |  |  |  |  |  |
| ACICU_00888 |                             | choline dehydrogenase                       |                                                                       |                     | 818.4      | 898.7      | 1146.8     | 1058.2     | 1333.5     | 446.3      | 1414.8     | 145.3      | 333.3      | 293.2     | 286.7     | 145.4     | 153.4     | 149.6     | 324.0     | 194.1     | 770.0     | 333.1     | 143.4      | 102.5      | 77.2       | 113.6      | 60.4      | 111.6     |  |  |  |  |  |  |   |  |  |  |  |  |  |  |  |  |
| ACICU_00889 |                             | betaine-aldehyde dehydrogenase              |                                                                       |                     | 1203.1     | 1437.8     | 1750.7     | 1560.7     | 1969.9     | 801.6      | 1992.4     | 31.9       | 665.6      | 473.2     | 402.8     | 200.2     | 245.2     | 274.7     | 412.7     | 312.0     | 737.0     | 51.0      | 251.9      | 199.1      | 133.0      | 213.1      | 196.0     | 157.5     |  |  |  |  |  |  |   |  |  |  |  |  |  |  |  |  |
| ACICU_00890 |                             | Bett family transcriptional regulator       |                                                                       |                     | 613.5      | 869.4      | 1307.0     | 1180.7     | 858.1      | 614.2      | 919.9      | 250.3      | 368.4      | 699.0     | 643.4     | 325.2     | 504.3     | 595.1     | 758.8     | 603.9     | 218.5     | 313.4     | 210.2      | 106.8      | 85.3       | 110.4      | 178.6     | 186.7     |  |  |  |  |  |  |   |  |  |  |  |  |  |  |  |  |
| ACICU_00891 |                             | choline transporter                         |                                                                       |                     | 206.5      | 219.4      | 298.6      | 265.2      | 267.7      | 128.5      | 274.6      | 57.8       | 112.4      | 308.8     | 124.5     | 74.9      | 73.7      | 95.2      | 100.9     | 68.0      | 214.6     | 68.7      | 56.3       | 32.9       | 29.3       | 55.5       | 77.1      | 38.4      |  |  |  |  |  |  |   |  |  |  |  |  |  |  |  |  |
| ACICU_00895 |                             | hypothetical protein                        |                                                                       |                     | 21.9       | 152.0      | 224.2      | 23.9       | 11.6       | 14.8       | 170.1      | 77.5       | 346.8      | 83.1      | 123.4     | 125.0     | 347.4     | 218.7     | 79.3      | 88.4      | 121.9     | 277.6     | 525.0      | 254.9      | 542.6      | 567.4      | 68.8      | 70.0      |  |  |  |  |  |  |   |  |  |  |  |  |  |  |  |  |
| ACICU_01023 |                             | hypothetical protein                        | phage region, variable sequence                                       | sequence variation  | 123.5      | 95.6       | 109.5      | 139.2      | 120.4      | 103.5      | 93.7       | 66.6       | 0.0        | 252.4     | 212.0     | 236.5     | 83.4      | 129.1     | 95.4      | 112.4     | 95.5      | 209.8     | 203.8      | 179.7      | 503.6      | 685.5      | 628.5     | 907.5     |  |  |  |  |  |  |   |  |  |  |  |  |  |  |  |  |
| ACICU_01027 |                             | hypothetical protein                        |                                                                       |                     | 55.8       | 107.1      | 64.3       | 25.3       | 20.2       | 18.7       | 56.6       | 11.2       | 0.0        | 183.0     | 347.0     | 856.6     | 314.8     | 119.5     | 40.6      | 10.6      | 37.0      | 307.4     | 1803.5     | 385.4      | 2037.9     | 873.0      | 410.3     | 337.0     |  |  |  |  |  |  |   |  |  |  |  |  |  |  |  |  |
| ACICU_01072 |                             | lipid A phosphoethanolamine transferase     | pmr related                                                           | sequence variation  | 17.9       | 15.2       | 15.6       | 39.4       | 51.6       | 254.5      | 11.9       | 4.4        | 11.2       | 14.4      | 21.1      | 27.3      | 13.2      | 80.5      | 8.3       | 10.5      | 13.1      | 13.6      | 15.3       | 16.2       | 10.7       | 137.0      | 111.4     | 219.2     |  |  |  |  |  |  |   |  |  |  |  |  |  |  |  |  |
| ACICU_01172 |                             | outer membrane protein                      | ISAbat1 up from ACICU_01172 in P588                                   | insertion sequence  | 200.4      | 133.8      | 95.2       | 122.3      | 106.6      | 106.7      | 99.8       | 111.1      | 523.2      | 206.5     | 204.8     | 263.2     | 451.5     | 489.6     | 339.9     | 325.6     | 140.9     | 268.1     | 619.7      | 322.8      | 16.4       | 13.5       | 332.9     | 236.2     |  |  |  |  |  |  |   |  |  |  |  |  |  |  |  |  |
| ACICU_01188 |                             | Y benzoate transporter                      | ISAbat1 in middle of 01189, expression up of adjacent 01188, benzoate | insertion sequence  | 3.4        | 3.0        | 4.4        | 3.1        | 4.2        | 5.4        | 3.8        | 5.5        | 3.9        | 5.1       | 5.3       | 4.2       | 4.9       | 4.8       | 3.6       | 2.5       | 4.9       | 36.9      | 58.5       | 23.1       | 5.3        | 5.1        | 5.2       | 6.8       |  |  |  |  |  |  |   |  |  |  |  |  |  |  |  |  |
| ACICU_01194 |                             | heavy metal transporter                     | None ID                                                               | none identified     | 159.5      | 180.1      | 263.2      | 241.9      | 132.8      | 194.0      | 306.5      | 134.8      | 101.8      | 45.5      | 55.4      | 86.2      | 84.1      | 121.5     | 97.5      | 131.4     | 193.2     | 50.9      | 86.6       | 43.2       | 97.8       | 51.5       | 55.3      | 75.3      |  |  |  |  |  |  |   |  |  |  |  |  |  |  |  |  |
| ACICU_01195 |                             | ATPase                                      |                                                                       |                     | 104.6      | 170.0      | 74.0       | 112.6      | 193.6      | 112.7      | 165.0      | 61.9       | 57.0       | 30.7      | 27.6      | 24.8      | 54.2      | 52.9      | 80.9      | 111.4     | 104.7     | 17.2      | 21.8       | 32.0       | 27.5       | 32.1       | 31.9      | 30.9      |  |  |  |  |  |  |   |  |  |  |  |  |  |  |  |  |
| ACICU_01198 |                             | cysteine-rich helical bundle repeat protein |                                                                       |                     | 2035.9     | 2994.7     | 1948.1     | 741.5      | 789.5      | 583.9      | 401.1      | 535.8      | 2178.8     | 7270.0    | 4783.8    | 7899.0    | 12822.5   | 4866.3    | 4342.9    | 5843.4    | 1310.7    | 4063.5    | 18492.3    | 4739.1     | 18920.8    | 9407.1     | 5518.6    | 4368.6    |  |  |  |  |  |  |   |  |  |  |  |  |  |  |  |  |
| ACICU_01199 |                             | Y hypothetical protein                      |                                                                       |                     | 84.5       | 143.0      | 127.2      | 93.4       | 99.3       | 101.3      | 100.6      | 67.6       | 107.5      | 42.6      | 107.0     | 40.4      |           |           |           |           |           |           |            |            |            |            |           |           |  |  |  |  |  |  |   |  |  |  |  |  |  |  |  |  |

|             |                                                        |                                                                                     |                                                                                          |        |        |        |        |        |        |        |        |        |        |        |        |        |        |        |        |        |        |        |        |        |        |        |        |
|-------------|--------------------------------------------------------|-------------------------------------------------------------------------------------|------------------------------------------------------------------------------------------|--------|--------|--------|--------|--------|--------|--------|--------|--------|--------|--------|--------|--------|--------|--------|--------|--------|--------|--------|--------|--------|--------|--------|--------|
| ACICU_02866 | glycosyl transferase family 2                          | pnm related                                                                         | mutation                                                                                 | 2.7    | 2.2    | 2.9    | 9.2    | 7.6    | 111.9  | 0.9    | 1.9    | 1.6    | 2.7    | 4.1    | 4.6    | 1.4    | 35.0   | 3.1    | 1.6    | 1.1    | 2.2    | 2.4    | 3.9    | 1.9    | 92.6   | 41.9   | 538    |
| ACICU_02867 | polysaccharide biosynthesis protein GtrA               |                                                                                     |                                                                                          | 1.9    | 1.7    | 0.5    | 2.7    | 4.5    | 44.5   | 0.0    | 0.8    | 0.5    | 1.5    | 2.0    | 2.2    | 0.4    | 8.0    | 1.4    | 1.2    | 1.5    | 1.0    | 1.6    | 2.3    | 0.8    | 38.8   | 17.0   | 169    |
| ACICU_02868 | dolichyl-phosphate-mannose-protein mannosyltransferase |                                                                                     |                                                                                          | 4.4    | 3.4    | 3.6    | 5.2    | 4.7    | 50.3   | 2.5    | 2.8    | 3.8    | 4.7    | 5.5    | 4.7    | 4.8    | 25.1   | 1.9    | 2.5    | 5.6    | 2.6    | 5.0    | 3.6    | 3.7    | 52.7   | 22.5   | 384    |
| ACICU_02895 | peptide synthetase                                     |                                                                                     |                                                                                          | 4.9    | 4.2    | 6.6    | 26.5   | 27.6   | 187.1  | 4.6    | 4.0    | 5.0    | 7.1    | 12.4   | 11.5   | 4.4    | 54.8   | 4.1    | 4.9    | 4.3    | 3.1    | 5.1    | 6.2    | 4.7    | 228.2  | 48.1   | 190.5  |
| ACICU_02907 | Y diacylglycerol kinase                                | pnm related                                                                         | mutation                                                                                 | 13.0   | 10.9   | 15.7   | 54.2   | 52.7   | 219.4  | 7.8    | 10.4   | 10.6   | 20.5   | 26.6   | 26.3   | 25.1   | 119.4  | 7.5    | 14.1   | 11.9   | 13.2   | 16.7   | 13.2   | 19.4   | 209.0  | 548.7  | 204.1  |
| ACICU_02938 | Y type I secretion protein                             | ACICU_02946 ISABa27 upstream in 588 isolates, genes between ACI1 insertion sequence |                                                                                          | 278.5  | 221.4  | 243.4  | 191.3  | 226.6  | 142.8  | 251.9  | 91.5   | 267.6  | 196.0  | 243.6  | 229.2  | 463.8  | 284.5  | 962.8  | 728.7  | 311.0  | 671.6  | 388.9  | 670.2  | 47.8   | 61.0   | 580.4  | 979.5  |
| ACICU_02980 | hypothetical protein                                   | None ID                                                                             | none identified                                                                          | 12.3   | 21.9   | 23.1   | 20.2   | 22.3   | 20.9   | 22.3   | 29.9   | 25.9   | 69.9   | 63.8   | 82.8   | 30.1   | 27.4   | 22.2   | 16.4   | 16.9   | 73.4   | 117.0  | 84.6   | 117.3  | 136.2  | 149.2  | 141.9  |
| ACICU_03000 | ammonium transporter                                   | None ID                                                                             | none identified                                                                          | 30.4   | 13.3   | 8.6    | 16.4   | 16.2   | 15.1   | 26.9   | 7.5    | 20.7   | 18.0   | 13.1   | 16.0   | 18.6   | 9.2    | 107.7  | 114.1  | 12.8   | 24.0   | 9.4    | 41.6   | 12.2   | 13.1   | 10.2   | 24.7   |
| ACICU_03001 | hypothetical protein                                   | pnm related                                                                         | mutation                                                                                 | 3.9    | 2.5    | 2.9    | 8.1    | 13.8   | 61.3   | 2.4    | 1.6    | 2.0    | 4.8    | 6.9    | 6.6    | 3.8    | 29.1   | 1.1    | 4.9    | 1.9    | 1.9    | 4.5    | 6.0    | 4.6    | 69.2   | 18.2   | 57.7   |
| ACICU_03002 | pmrB histidine kinase                                  |                                                                                     |                                                                                          | 38.6   | 35.3   | 29.9   | 34.0   | 308.7  | 34.7   | 50.8   | 60.0   | 34.7   | 36.7   | 54.9   | 44.4   | 39.7   | 162.3  | 34.5   | 44.4   | 39.7   | 36.7   | 54.9   | 44.4   | 63.9   | 255.5  | 220.1  | 64.9   |
| ACICU_03003 | pmrA transcriptional regulator                         |                                                                                     |                                                                                          | 10.8   | 15.6   | 14.5   | 33.6   | 34.2   | 187.3  | 11.4   | 20.7   | 16.1   | 25.4   | 25.5   | 16.8   | 76.7   | 10.4   | 16.8   | 12.6   | 23.0   | 22.4   | 16.4   | 23.1   | 145.1  | 121.1  | 176.8  | 145.1  |
| ACICU_03004 | pmrC lipid A phosphoethanolamine transferase           |                                                                                     |                                                                                          | 4.5    | 3.1    | 7.0    | 39.0   | 36.4   | 268.5  | 2.8    | 2.0    | 3.0    | 4.9    | 24.7   | 17.5   | 4.7    | 100.2  | 1.0    | 3.4    | 4.7    | 3.8    | 8.7    | 5.0    | 6.1    | 196.1  | 164.0  | 245.3  |
| ACICU_03044 | sodium/alanine symporter                               |                                                                                     | none identified                                                                          | 20.0   | 9.1    | 12.6   | 10.4   | 11.0   | 12.3   | 8.5    | 24.9   | 20.6   | 36.7   | 41.8   | 40.2   | 15.6   | 15.3   | 30.4   | 13.3   | 24.4   | 64.6   | 20.9   | 54.4   | 33.9   | 82.3   | 81.4   | 65.2   |
| ACICU_03076 | oxidoreductase                                         | ISABa1 in clade A and B                                                             | insertion sequence                                                                       | 22.4   | 27.1   | 27.6   | 18.2   | 17.9   | 29.3   | 28.4   | 35.9   | 53.9   | 85.4   | 62.7   | 93.1   | 92.9   | 37.8   | 39.4   | 42.3   | 25.5   | 111.1  | 225.5  | 105.0  | 226.3  | 96.9   | 117.5  | 118.2  |
| ACICU_03111 | peroxidase                                             | None ID                                                                             |                                                                                          | 232.9  | 591.4  | 518.1  | 271.4  | 142.7  | 121.4  | 453.5  | 96.7   | 232.0  | 463.4  | 494.2  | 916.5  | 961.9  | 492.1  | 250.7  | 366.8  | 174.2  | 612.2  | 1615.0 | 702.0  | 1191.8 | 811.9  | 639.3  | 475.3  |
| ACICU_03285 | flavohemoprotein                                       | None ID                                                                             | none identified                                                                          | 780.1  | 897.3  | 306.0  | 324.4  | 2068.7 | 1431.5 | 2091.3 | 1110.0 | 312.5  | 170.3  | 103.6  | 98.3   | 208.8  | 359.9  | 474.0  | 2155.2 | 500.4  | 70.8   | 57.5   | 148.1  | 164.0  | 145.5  | 256.3  | 167.1  |
| ACICU_03286 | transcriptional regulator                              |                                                                                     |                                                                                          | 79.6   | 112.8  | 56.4   | 51.6   | 243.8  | 134.5  | 229.1  | 110.9  | 33.9   | 42.3   | 36.9   | 28.5   | 20.2   | 48.1   | 31.4   | 216.7  | 66.6   | 34.6   | 41.0   | 37.4   | 42.2   | 34.0   | 33.9   | 37.8   |
| ACICU_03305 | DEAD/DEAH box helicase                                 |                                                                                     | sequence divergence here, A&B same vs C&D same(9 mismatch, 1 ga sequence variation)      | 7325.5 | 6995.4 | 7520.2 | 7364.2 | 8703.4 | 4550.9 | 9789.3 | 2970.6 | 5137.9 | 5185.9 | 5449.7 | 4544.3 | 3628.5 | 3612.1 | 4883.0 | 4580.0 | 5319.0 | 7071.6 | 2245.9 | 7292.2 | 1163.1 | 1730.3 | 2236.4 | 1719.4 |
| ACICU_03344 | superoxide dismutase                                   | None ID                                                                             | none identified                                                                          | 10.4   | 16.7   | 11.7   | 73.1   | 64.4   | 136.6  | 66.2   | 130.2  | 231.1  | 233.1  | 258.1  | 299.0  | 246.7  | 176.4  | 192.0  | 159.7  | 93.0   | 373.3  | 775.3  | 315.6  | 779.4  | 301.2  | 327.9  | 341.1  |
| ACICU_03382 | hypothetical protein                                   |                                                                                     | none identified                                                                          | 16.4   | 31.4   | 28.2   | 22.5   | 17.8   | 30.5   | 29.7   | 18.8   | 22.2   | 78.6   | 72.5   | 96.1   | 40.3   | 39.4   | 24.7   | 33.3   | 32.5   | 129.5  | 134.3  | 130.9  | 215.0  | 142.1  | 155.0  | 91.3   |
| ACICU_03394 | Y plus assembly protein PiliM                          |                                                                                     | sequence divergence between clade D and others, but otherwise identic sequence variation | 224.0  | 80.3   | 82.0   | 304.2  | 270.2  | 347.0  | 146.1  | 245.8  | 186.6  | 158.2  | 93.2   | 85.8   | 98.3   | 128.3  | 102.4  | 104.7  | 167.3  | 35.9   | 26.9   | 49.9   | 44.2   | 67.7   | 66.0   | 57.2   |
| ACICU_03422 | sulfate permease                                       |                                                                                     | sequence variation                                                                       | 13.9   | 19.5   | 31.0   | 12.3   | 10.5   | 21.3   | 22.7   | 7.2    | 51.6   | 84.8   | 94.1   | 120.9  | 62.7   | 65.0   | 30.6   | 27.0   | 16.4   | 32.1   | 51.6   | 22.3   | 121.9  | 43.5   | 91.9   | 176.0  |
| ACICU_03437 | membrane protein                                       | clade B ISABa1 in ACICU_03437                                                       | insertion sequence                                                                       | 82.9   | 66.3   | 45.6   | 69.4   | 65.5   | 74.2   | 50.3   | 59.4   | 96.8   | 48.6   | 50.6   | 49.1   | 23.4   | 16.0   | 11.3   | 13.7   | 21.2   | 54.7   | 50.0   | 74.2   | 79.2   | 87.2   | 103.4  | 113.3  |
| ACICU_03447 | hypothetical protein                                   | None ID                                                                             | none identified                                                                          | 59.7   | 127.1  | 152.2  | 30.7   | 35.4   | 38.9   | 197.6  | 53.9   | 271.0  | 227.9  | 219.2  | 328.4  | 471.9  | 214.3  | 175.8  | 235.1  | 110.1  | 250.2  | 713.9  | 368.4  | 894.6  | 738.5  | 257.1  | 209.9  |
| ACICU_03477 | 4-aminobutyrate aminotransferase                       | mutation in ACICU_03477, in 667276                                                  | mutation                                                                                 | 105.8  | 214.4  | 174.6  | 201.9  | 199.9  | 256.9  | 125.0  | 172.4  | 80.1   | 46.1   | 85.6   | 98.7   | 273.8  | 314.6  | 282.1  | 251.9  | 204.9  | 280.9  | 302.1  | 278.8  | 278.1  | 210.0  | 128.7  | 114.0  |
| ACICU_03479 | gamma-aminobutyrate transporter                        |                                                                                     |                                                                                          | 82.7   | 102.3  | 81.3   | 114.7  | 110.5  | 163.2  | 71.5   | 138.1  | 64.8   | 41.0   | 54.2   | 64.6   | 188.7  | 179.1  | 148.2  | 123.0  | 1368.2 | 141.9  | 165.2  | 160.7  | 167.7  | 164.9  | 73.6   | 70.8   |
| ACICU_03576 | ABC transporter substrate-binding protein              |                                                                                     | sequence divergence between D vs A-C, predicted to be antigenic pept sequence variation  | 39.9   | 53.9   | 50.3   | 27.6   | 22.9   | 41.1   | 57.8   | 67     | 61.6   | 95.7   | 103.6  | 166.3  | 58.2   | 50.5   | 23.4   | 46.9   | 25.3   | 52.5   | 141.0  | 64.6   | 38.0   | 43.5   | 3.2    | 23.0   |
| ACICU_03585 | hypothetical protein                                   | None ID                                                                             | none identified                                                                          | 3850.7 | 953.8  | 847.3  | 2776.2 | 4029.9 | 3568.7 | 1931.2 | 2317.9 | 2087.4 | 1924.3 | 1127.3 | 1141.9 | 2108.4 | 194.0  | 230.0  | 3206.2 | 1911.8 | 590.3  | 398.8  | 977.0  | 1077.8 | 1398.9 | 1103.8 | 1651.7 |
| ACICU_03609 | aromatic amino acid transporter                        | PR ISABa125 in ACICU_03611                                                          | insertion sequence                                                                       | 9.9    | 19.9   | 13.4   | 12.4   | 9.4    | 14.4   | 6.7    | 11.7   | 4.7    | 8.1    | 20.7   | 209.5  | 15.6   | 14.4   | 11.8   | 7.5    | 8.5    | 8.3    | 7.7    | 8.8    | 9.5    | 8.7    | 70.6   | 57.5   |
| ACICU_03610 | gamma-glucosidase                                      |                                                                                     |                                                                                          | 75.1   | 188.0  | 115.1  | 134.7  | 82.7   | 125.7  | 96.2   | 12.7   | 35.2   | 23.4   | 32.5   | 255.0  | 19.3   | 105.2  | 98.6   | 105.2  | 98.3   | 35.9   | 48.6   | 281.0  | 274.5  | 281.0  | 274.5  | 281.0  |
| ACICU_03614 | 4-hydroxyphenylpyruvate dioxygenase                    |                                                                                     |                                                                                          | 48.6   | 104.9  | 43.1   | 83.5   | 48.5   | 94.3   | 46.8   | 106.7  | 30.8   | 38.8   | 157.6  | 1675.4 | 79.3   | 77.6   | 79.0   | 54.4   | 38.2   | 22.3   | 33.6   | 31.6   | 62.8   | 76.1   | 256.0  | 248.7  |
| ACICU_03627 | Y membrane protein                                     | None ID                                                                             | none identified                                                                          | 232.5  | 454.6  | 578.2  | 133.2  | 116.3  | 74.1   | 425.9  | 50.5   | 175.1  | 594.5  | 538.6  | 516.6  | 817.3  | 759.8  | 255.0  | 434.7  | 211.4  | 1079.9 | 1885.4 | 667.8  | 1073.5 | 536.5  | 133.7  | 292.4  |
|             |                                                        | sequence variation                                                                  |                                                                                          |        |        |        |        |        |        | 11     |        |        |        |        |        |        |        |        |        |        |        |        |        |        |        |        |        |
|             |                                                        | insertion sequence                                                                  |                                                                                          |        |        |        |        |        |        | 21     |        |        |        |        |        |        |        |        |        |        |        |        |        |        |        |        |        |
|             |                                                        | mutation                                                                            |                                                                                          |        |        |        |        |        |        | 9      |        |        |        |        |        |        |        |        |        |        |        |        |        |        |        |        |        |
